# Supplementary material
Source: PubMed Central journal article supplement (PMC4790833)
Supplement: heik007385.ww2_default.pdf [file heik007385.ww2_default.pdf]

## **Appendix 2:** Supplementary information on potential confounders [posted as supplied by author]

### *Section 1. Categorising alcohol use*

One drink was defined as approximately equivalent to one unit or one glass of alcoholic drink or 10g of ethanol. Participants were categorised according to their alcohol intake as follows: non-drinkers, moderate drinkers (women: 1-14 drinks/week, men: 1-21 drinks/week), intermediate drinkers (women: 15-20 drinks/week, men: 22-27 drinks/week) and heavy drinkers (women:  $\geq 21$  drinks/wk, men:  $\geq 28$  drinks/week). The lower limit for intermediate drinking is based on public health guidelines in many countries<sup>1-4</sup>, whereas the lower limit for heavy drinking is based on estimated thresholds between the beneficial health effects of alcohol and an increased risk of type-2 diabetes, liver cirrhosis and death<sup>5-8</sup>.

### *Section 2. Identifying potential confounders and mediators*

All our analyses were adjusted for age, sex, socioeconomic position, body mass index (BMI), tobacco smoking and alcohol intake. These potential confounders were selected based on a priori knowledge of their associations with job strain and cancer.

Work stress, operationalised as job strain, has been shown to be associated with obesity, tobacco smoking, alcohol intake<sup>9-11</sup> and vary by age, sex and socioeconomic position<sup>12-17</sup>. The risk of cancer in general as well as colorectal, lung, breast and prostate cancers in particular increases with increasing age<sup>18</sup>. The overall cancer risk and the risk of the main cancer types in our analyses is associated with socioeconomic position<sup>19-21</sup>, BMI<sup>22</sup>, smoking<sup>23-25</sup> and alcohol intake<sup>26-29</sup>. Some cancers, such as colorectal cancer, are more common in men than women<sup>18</sup> and some cancers, such as breast or prostate cancers, only occur in either sex. We adjusted our lung cancer analyses for sex and alcohol intake, though there is some evidence from two recent meta-analysis that though sex and alcohol intake have been observed to be associated with lung cancer risk, the first association may be an artefact of the strong association between alcohol intake and smoking,<sup>26</sup> and the second related to other lung cancer risk factors differing in men and women<sup>30</sup>.

## References

1. *Dietary Guidelines for Americans, 2010*. 7 ed. Washington, DC, U.S. : Government Printing Office, 2010.
2. International Drinking Guidelines. *International Centre for Alcohol Policies*, 2010.
3. *National Institute for Health and Clinical Excellence: Alcohol-use disorders: preventing the development of hazardous and harmful drinking*. London: NICE, 2010.
4. World Health Organization: Substance Abuse; Facts; Alcohol, 2011.
5. Di Castelnuovo A, Costanzo S, Bagnardi V, Donati MB, Iacoviello L, de Gaetano G. Alcohol dosing and total mortality in men and women: an updated meta-analysis of 34 prospective studies. *Archives of internal medicine* 2006;166(22):2437-45.
6. Batty GD, Lewars H, Emslie C, Gale CR, Hunt K. Internationally recognized guidelines for 'sensible' alcohol consumption: is exceeding them actually detrimental to health and social circumstances? Evidence from a population-based cohort study. *Journal of public health (Oxford, England)* 2009;31(3):360-5.
7. Baliunas DO, Taylor BJ, Irving H, Roerecke M, Patra J, Mohapatra S, et al. Alcohol as a risk factor for type 2 diabetes: A systematic review and meta-analysis. *Diabetes care* 2009;32(11):2123-32.
8. Rehm J, Taylor B, Mohapatra S, Irving H, Baliunas D, Patra J, et al. Alcohol as a risk factor for liver cirrhosis: a systematic review and meta-analysis. *Drug and alcohol review* 2009;29(4):437-45.
9. Kouvonen A, Kivimaki M, Vaananen A, Heponiemi T, Elovainio M, Ala-Mursula L, et al. Job strain and adverse health behaviors: the Finnish Public Sector Study. *Journal of occupational and environmental medicine / American College of Occupational and Environmental Medicine* 2007;49(1):68-74.
10. Lallukka T, Lahelma E, Rahkonen O, Roos E, Laaksonen E, Martikainen P, et al. Associations of job strain and working overtime with adverse health behaviors and obesity: evidence from the Whitehall II Study, Helsinki Health Study, and the Japanese Civil Servants Study. *Social science & medicine (1982)* 2008;66(8):1681-98.
11. Siegrist J, Rodel A. Work stress and health risk behavior. *Scandinavian journal of work, environment & health* 2006;32(6):473-81.
12. Elovainio M, Kivimaki M, Ek E, Vahtera J, Honkonen T, Taanila A, et al. The effect of pre-employment factors on job control, job strain and psychological distress: a 31-year longitudinal study. *Social science & medicine (1982)* 2007;65(2):187-99.
13. Gadinger MC, Fischer JE, Schneider S, Terris DD, Kruckeberg K, Yamamoto S, et al. Gender moderates the health-effects of job strain in managers. *International archives of occupational and environmental health* 2010;83(5):531-41.
14. Li J, Yang W, Cho SI. Gender differences in job strain, effort-reward imbalance, and health functioning among Chinese physicians. *Social science & medicine (1982)* 2006;62(5):1066-77.
15. Lidwall U, Marklund S. What is healthy work for women and men? - A case-control study of gender- and sector-specific effects of psycho-social working conditions on long-term sickness absence. *Work (Reading, Mass)* 2006;27(2):153-63.
16. Lindert J, Muller-Nordhorn J, Soares JF. Age and distress of women--results of a representative population-based study. *Archives of women's mental health* 2009;12(3):173-81.
17. Marklund S, Bolin M, von Essen J. Can individual health differences be explained by workplace characteristics?--A multilevel analysis. *Social science & medicine (1982)* 2008;66(3):650-62.

18. Hoeijmakers JH. DNA damage, aging, and cancer. *The New England journal of medicine* 2009;361(15):1475-85.
19. Faggiano F, Partanen T, Kogevinas M, Boffetta P. Socioeconomic differences in cancer incidence and mortality. *IARC scientific publications* 1997(138):65-176.
20. Sidorchuk A, Agardh EE, Aremu O, Hallqvist J, Allebeck P, Moradi T. Socioeconomic differences in lung cancer incidence: a systematic review and meta-analysis. *Cancer Causes Control* 2009;20(4):459-71.
21. Aarts MJ, Lemmens VEPP, Louwman MWJ, Kunst AE, Coebergh JWW. Socioeconomic status and changing inequalities in colorectal cancer? A review of the associations with risk, treatment and outcome. *European Journal of Cancer* 2010;46(15):2681-95.
22. Renehan AG, Tyson M, Egger M, Heller RF, Zwahlen M. Body-mass index and incidence of cancer: a systematic review and meta-analysis of prospective observational studies. *The Lancet* 2008;371(9612):569-78.
23. Vineis P, Alavanja M, Buffler P, Fontham E, Franceschi S, Gao YT, et al. Tobacco and cancer: recent epidemiological evidence. *Journal of the National Cancer Institute* 2004;96(2):99-106.
24. Huncharek M, Haddock KS, Reid R, Kupelnick B. Smoking as a risk factor for prostate cancer: a meta-analysis of 24 prospective cohort studies. *Am J Public Health* 2010;100(4):693-701.
25. Doll R. Tobacco: an overview of health effects. *IARC scientific publications* 1986(74):11-22.
26. Bagnardi V, Blangiardo M, La Vecchia C, Corrao G. Alcohol consumption and the risk of cancer: a meta-analysis. *Alcohol Res Health* 2001;25(4):263-70.
27. Middleton Fillmore K, Chikritzhs T, Stockwell T, Bostrom A, Pascal R. Alcohol use and prostate cancer: a meta-analysis. *Molecular nutrition & food research* 2009;53(2):240-55.
28. Hamajima N, Hirose K, Tajima K, Rohan T, Calle EE, Heath CW, Jr., et al. Alcohol, tobacco and breast cancer--collaborative reanalysis of individual data from 53 epidemiological studies, including 58,515 women with breast cancer and 95,067 women without the disease. *British journal of cancer* 2002;87(11):1234-45.
29. Fedirko V, Tramacere I, Bagnardi V, Rota M, Scotti L, Islami F, et al. Alcohol drinking and colorectal cancer risk: an overall and dose-response meta-analysis of published studies. *Ann Oncol* 2011;Advance Access February 2011.
30. Freedman ND, Leitzmann MF, Hollenbeck AR, Schatzkin A, Abnet CC. Cigarette smoking and subsequent risk of lung cancer in men and women: analysis of a prospective cohort study. *The lancet oncology* 2008;9(7):649-56.
