# Supplementary material
Source: PubMed Central journal article supplement (PMC4790833)
Supplement: heik007385.ww3_default.pdf [file heik007385.ww3_default.pdf]

**Appendix 3:** Flow charts and participants' characteristics, by study [posted as supplied by author]

**Figure S1. Participant flow charts, by study**

NB: covariates are age, sex, SEP, BMI, smoking and alcohol use. BMI was not measured in Still Working and thus not used to define complete case in this study.

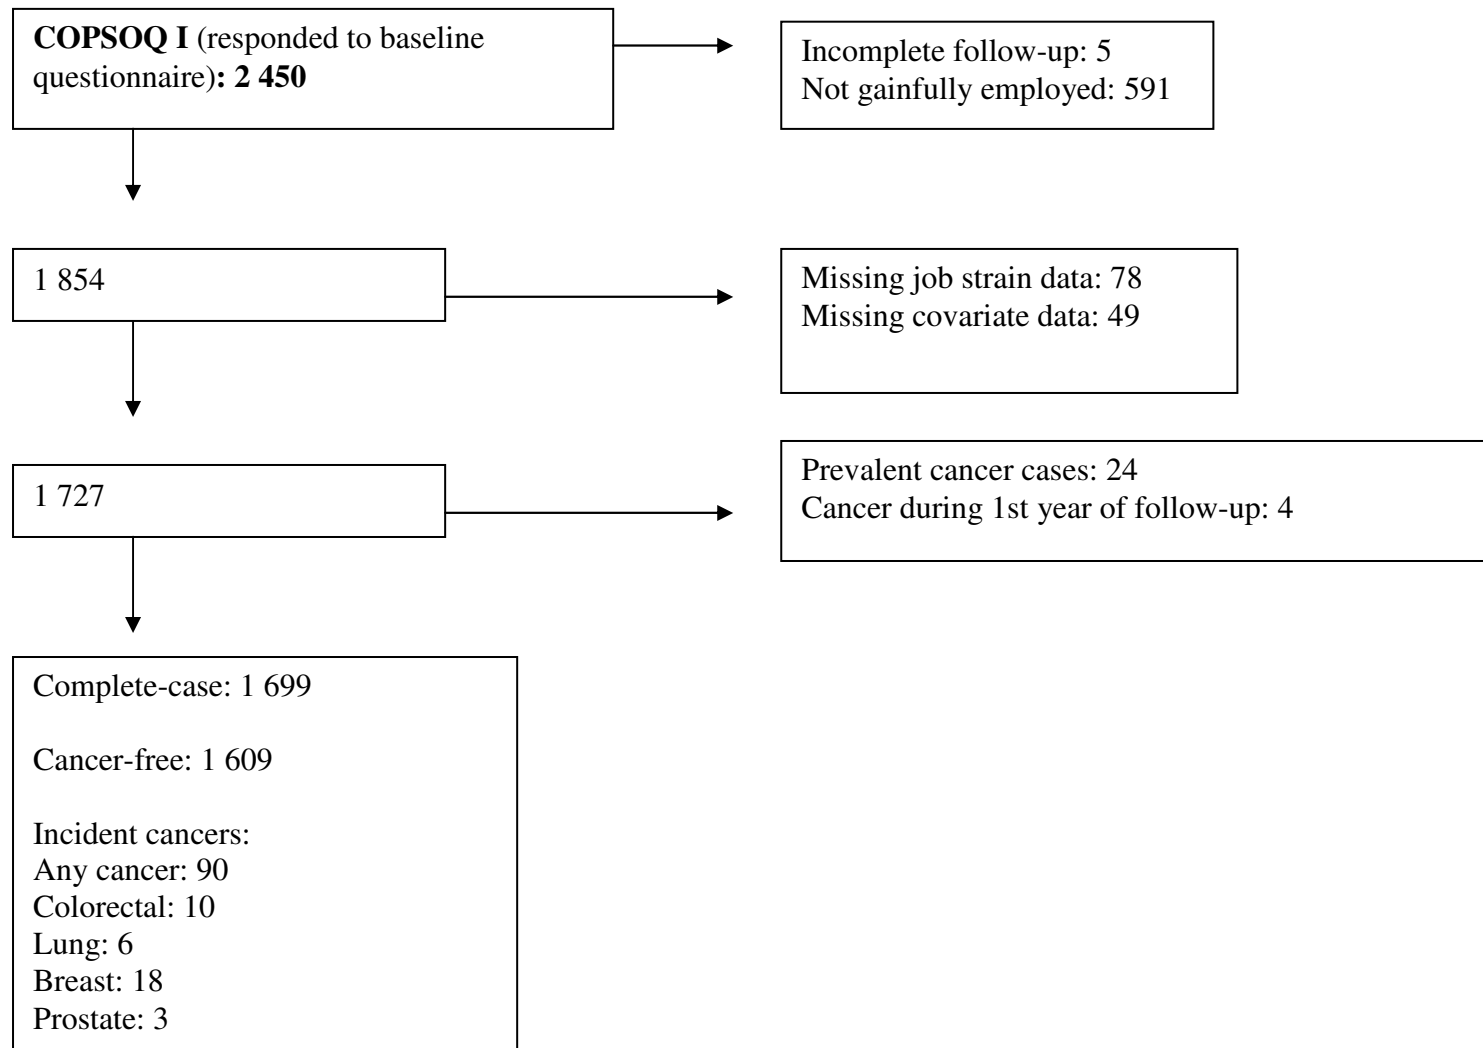

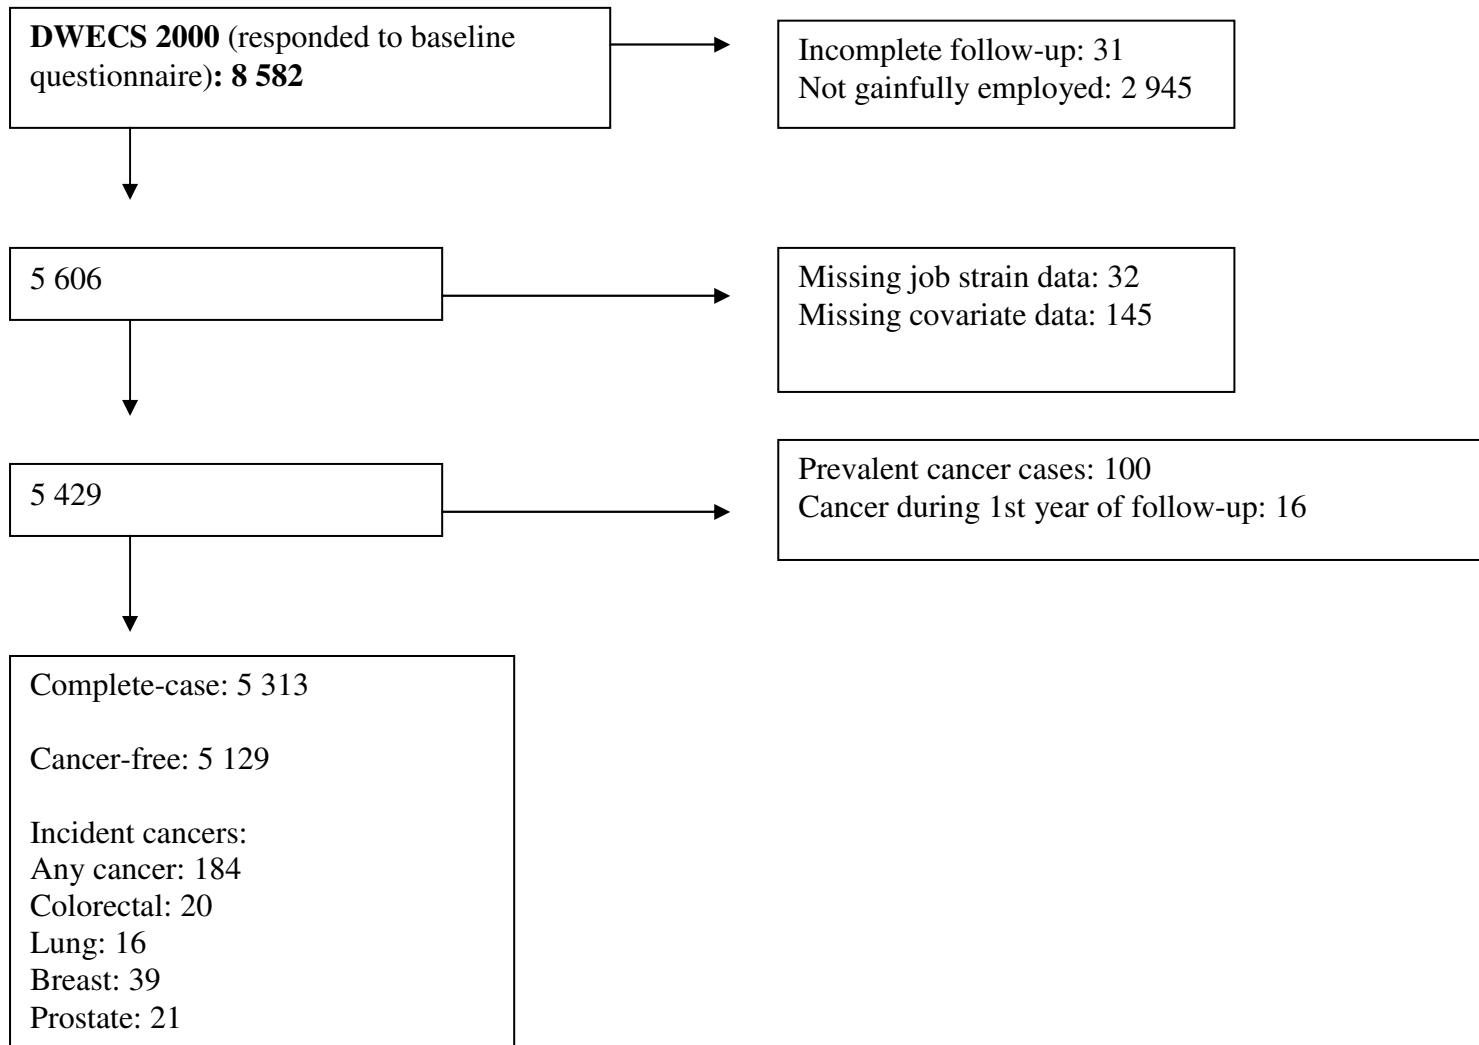

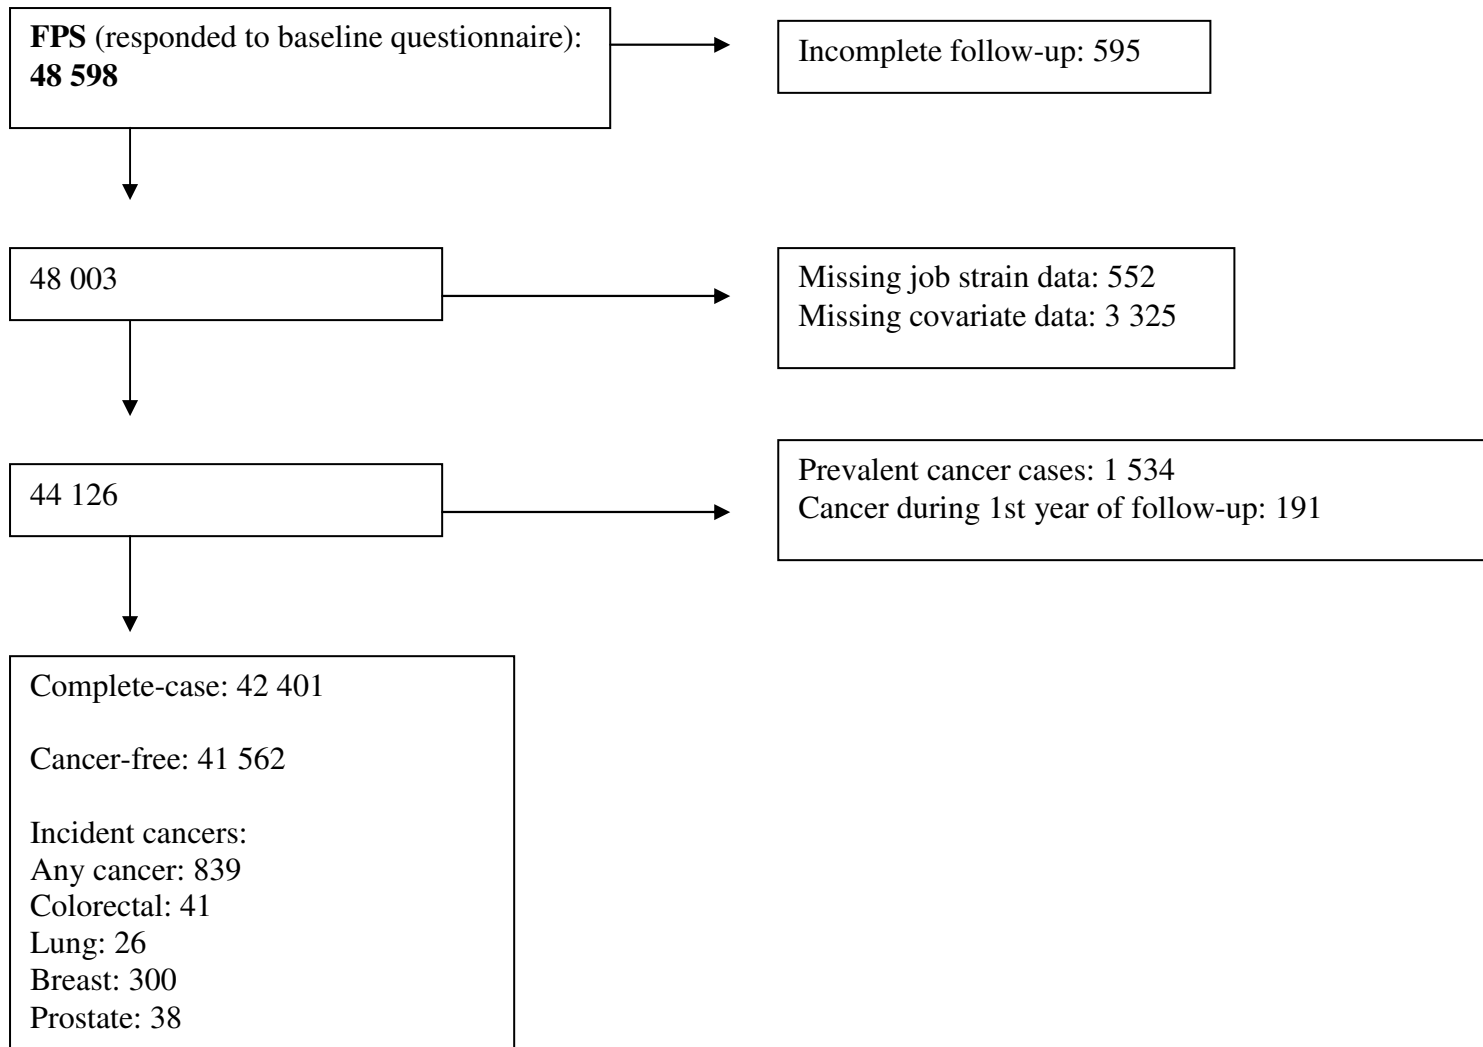

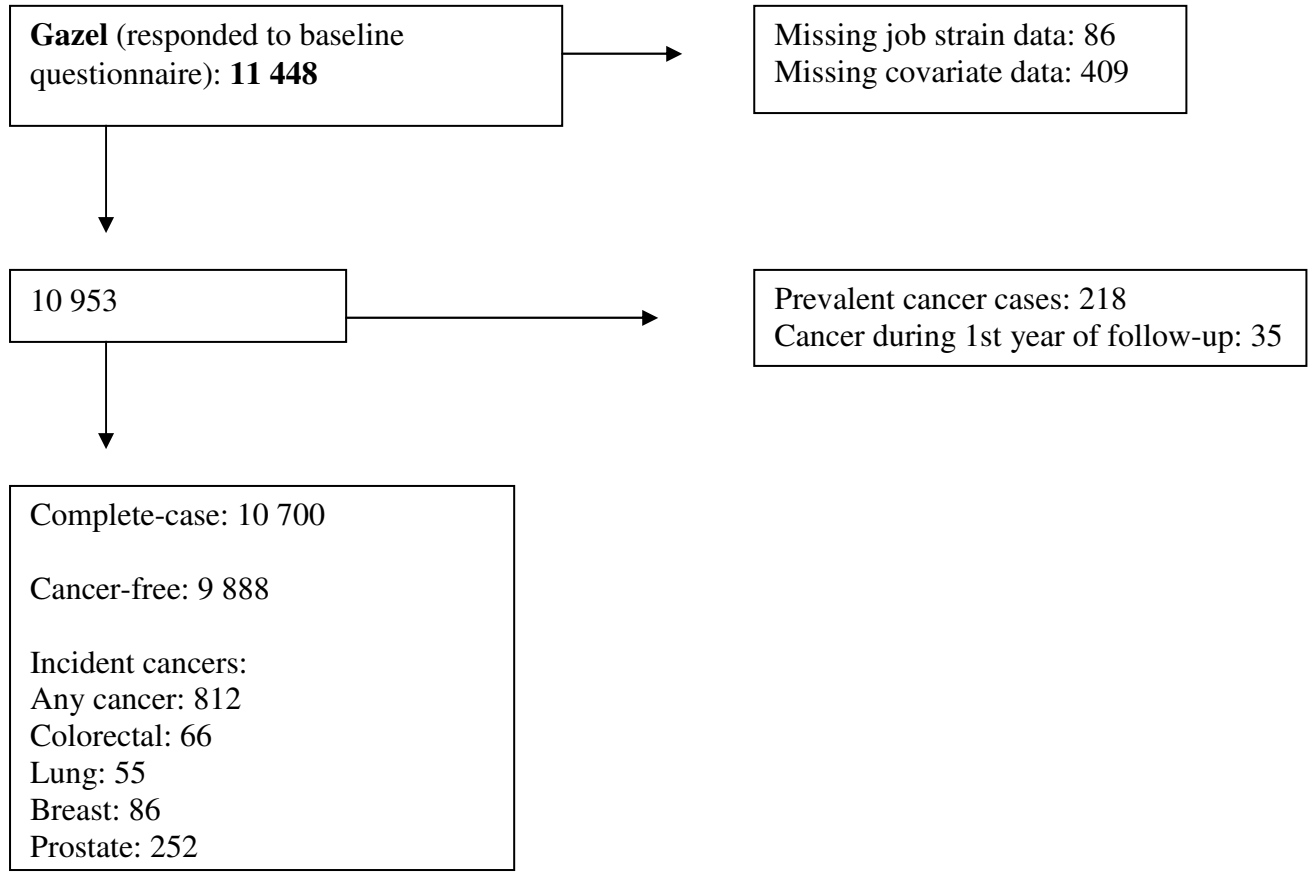

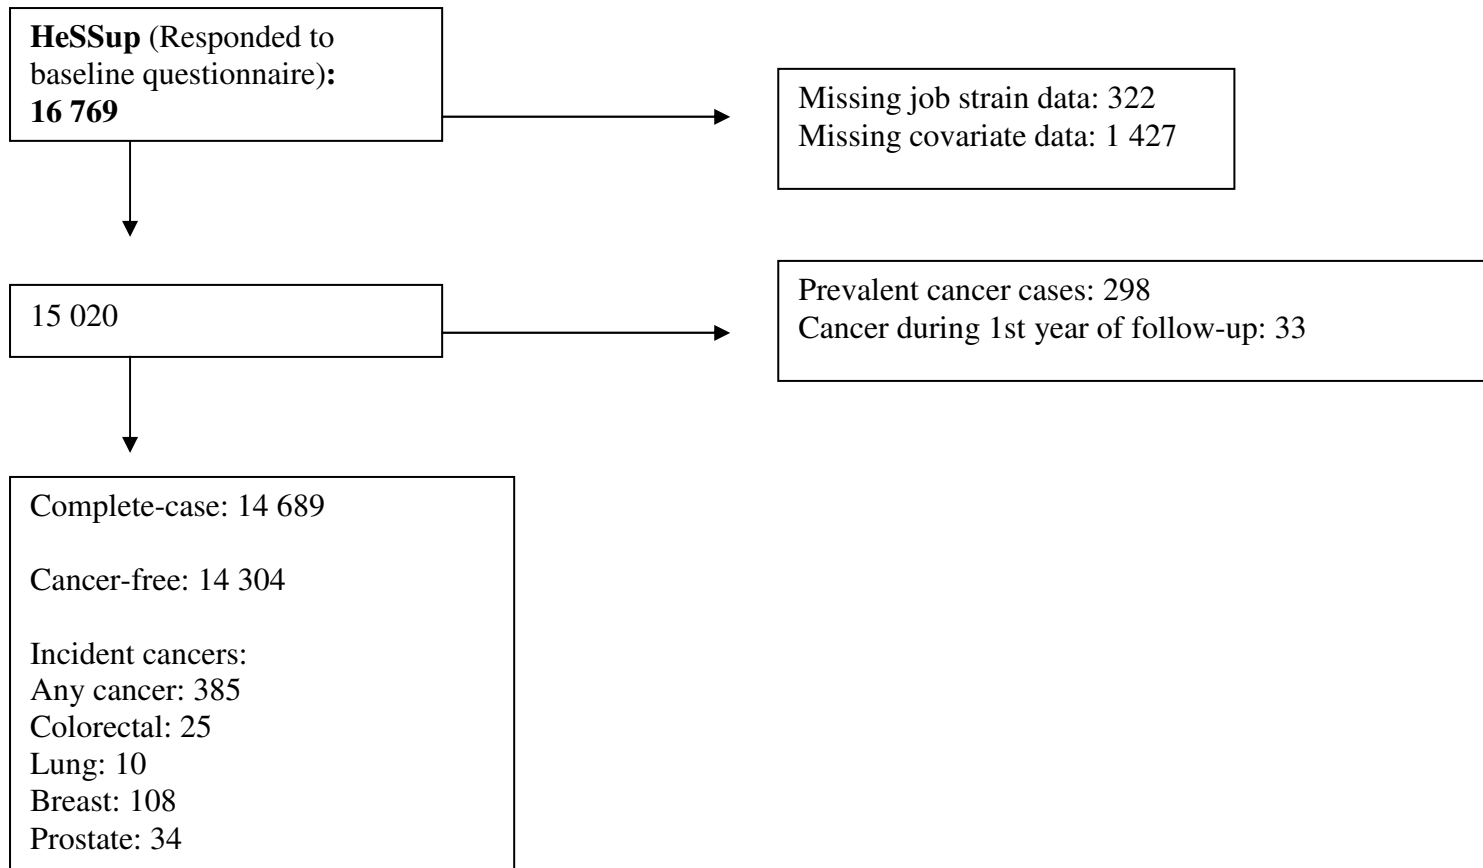

**IPAW** (responded to baseline questionnaire): **2055**

Missing job strain data: 25  
Missing covariate data: 107

1 923

Prevalent cancer cases: 34  
Cancer during 1st year of follow-up: 9

Complete-case: 1 880  
Cancer-free: 1769  
Incident cancers:  
Any cancer: 111  
Colorectal: 8  
Lung: 10  
Breast: 32  
Prostate: 7

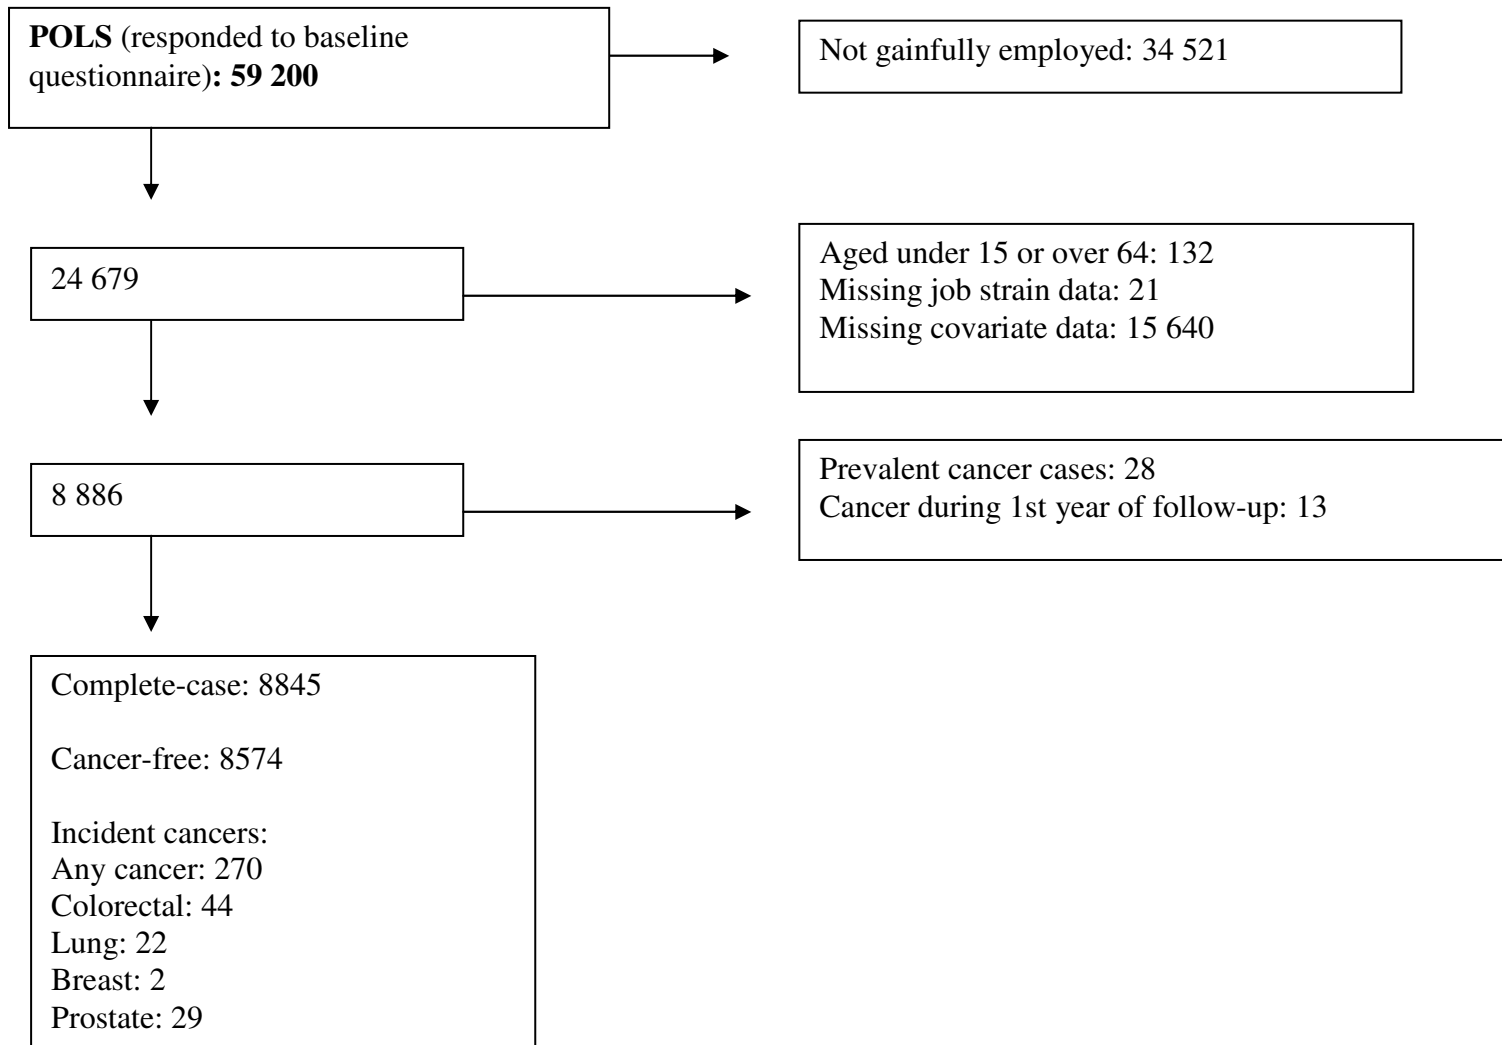

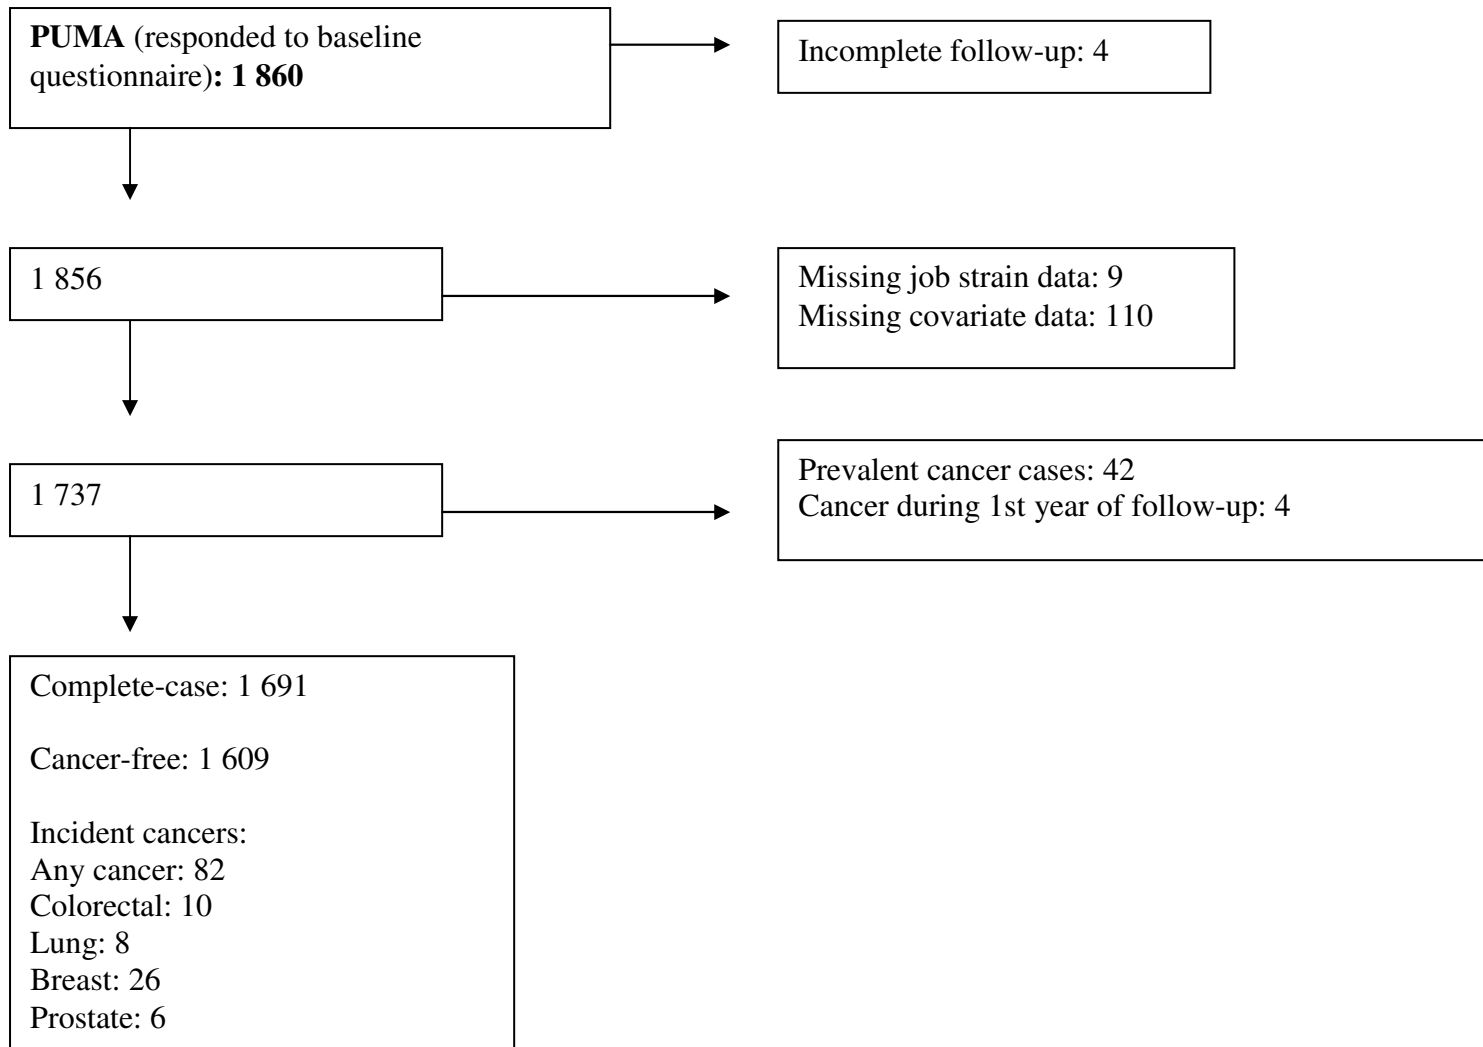



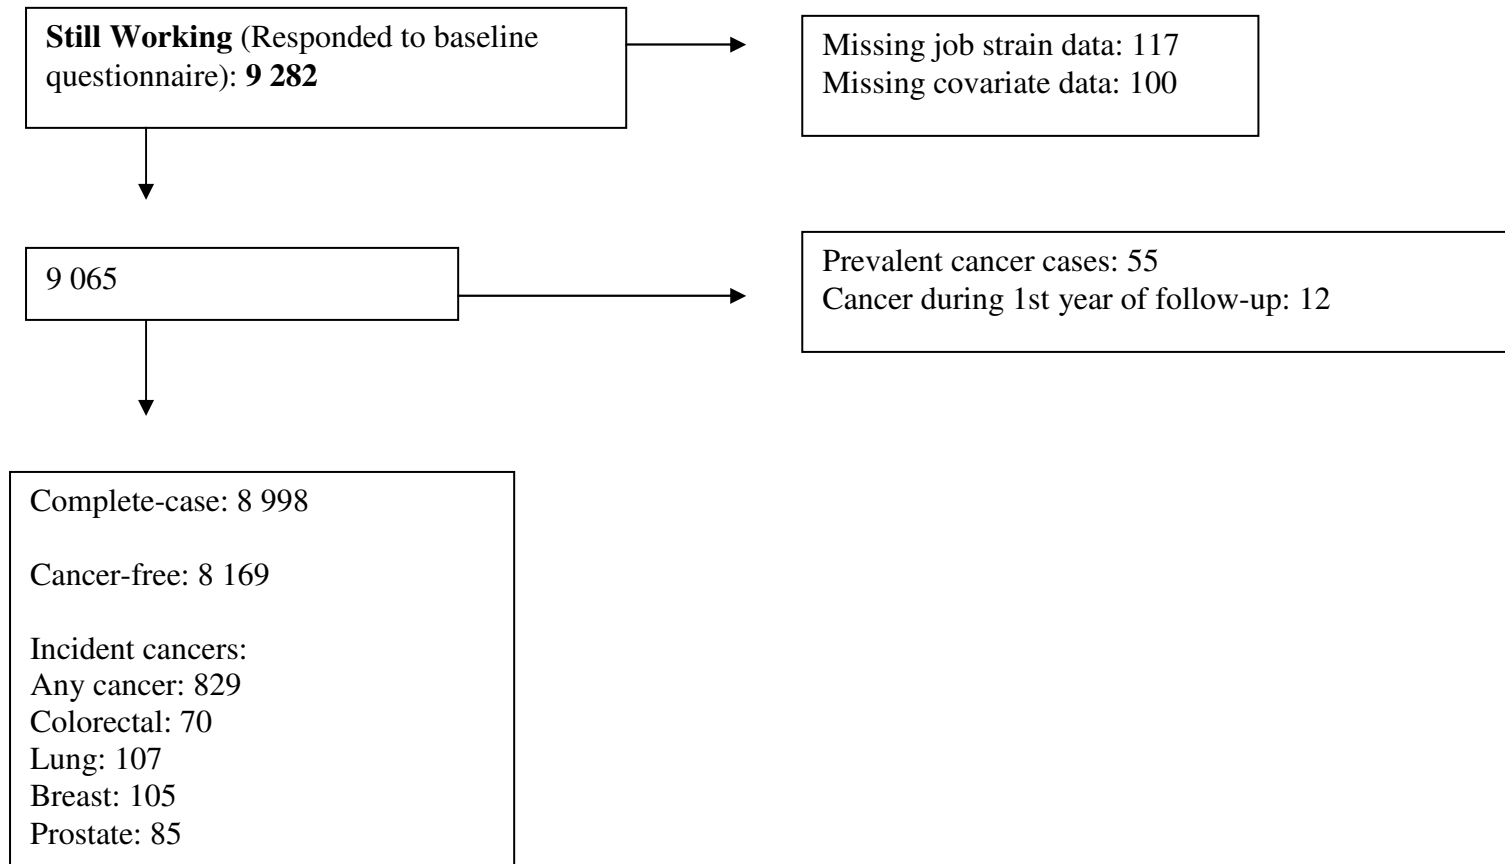

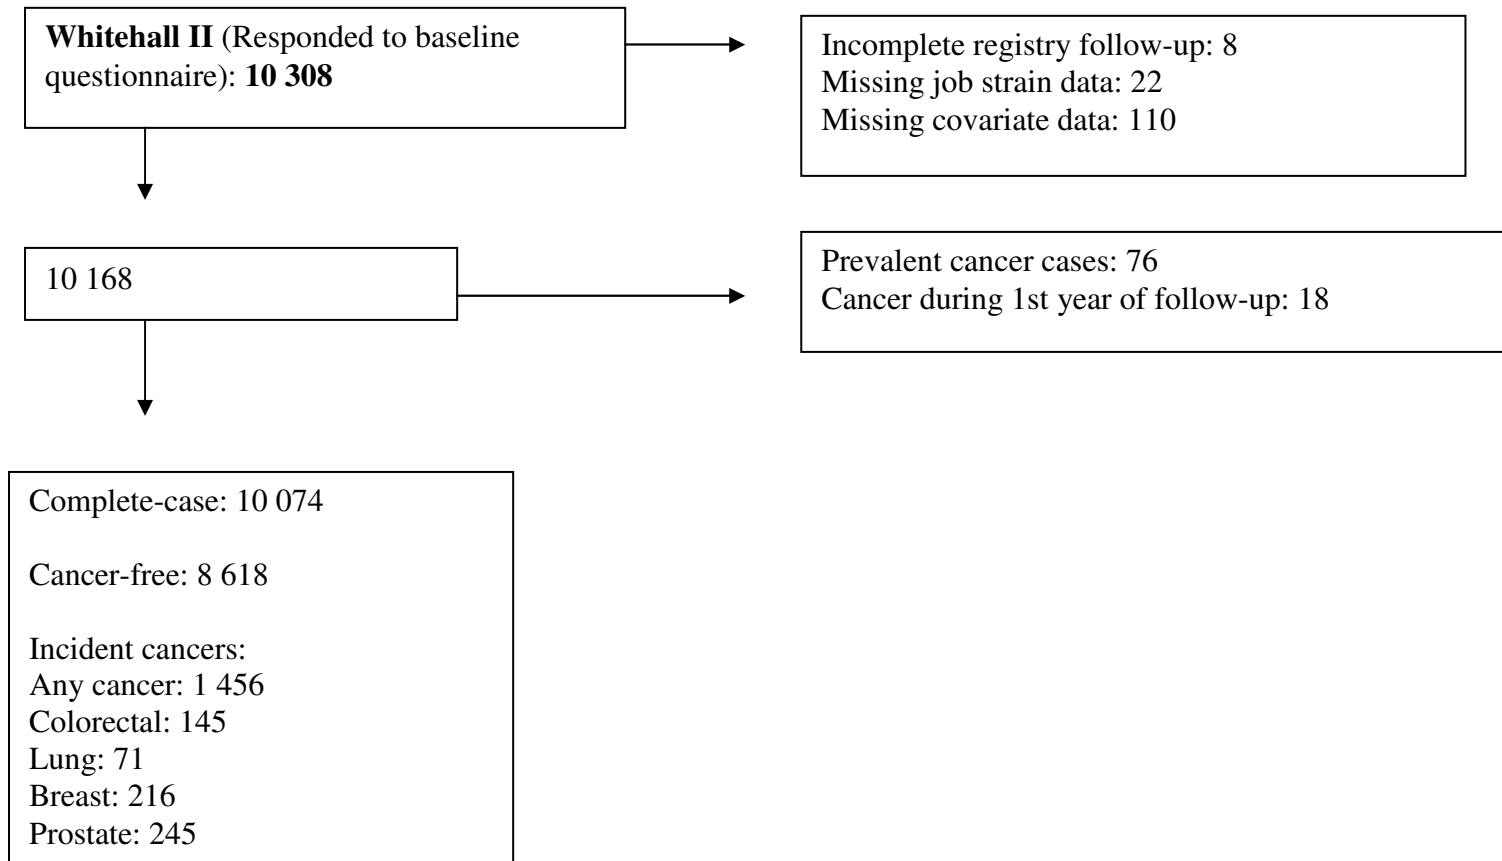

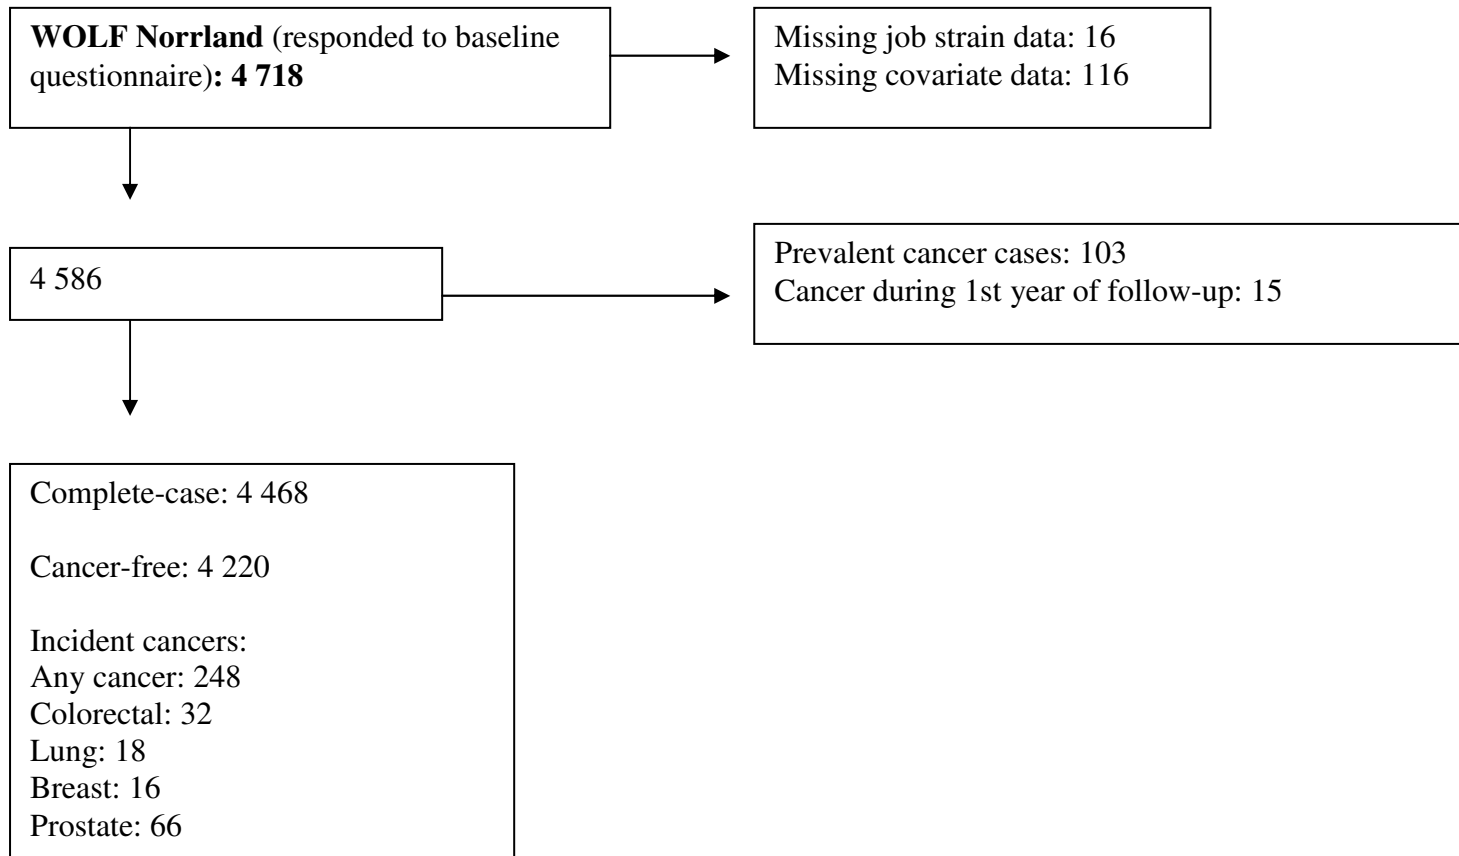

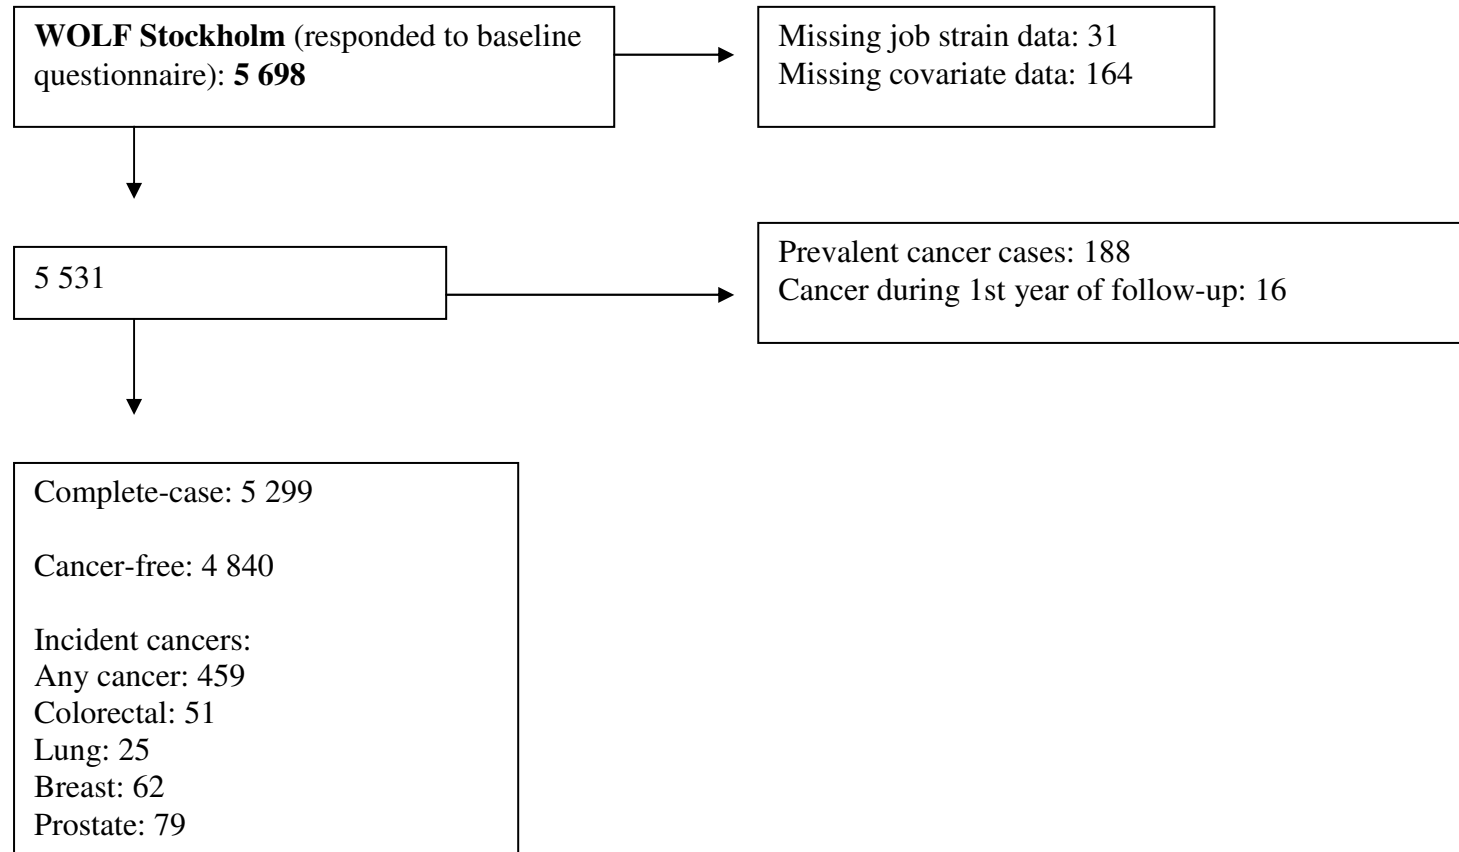

Table S1. Participant characteristics, by study

| <b>Study<sup>1</sup></b><br><b>(country)</b> | <b>N</b><br><b>participants<sup>2</sup></b> | <b>N (%) job</b><br><b>strain</b> | <b>N (%)</b><br><b>women</b> | <b>Mean (SD) range</b><br><b>age at baseline</b> | <b>N (%) low</b><br><b>SEP at</b><br><b>baseline</b> | <b>Mean (SD)</b><br><b>BMI at</b><br><b>baseline</b> | <b>N (%)</b><br><b>smokers at</b><br><b>baseline</b> | <b>N (%) heavy</b><br><b>drinkers at</b><br><b>baseline<sup>3</sup></b> |
|----------------------------------------------|---------------------------------------------|-----------------------------------|------------------------------|--------------------------------------------------|------------------------------------------------------|------------------------------------------------------|------------------------------------------------------|-------------------------------------------------------------------------|
| COPSOQ-I<br>(Denmark)                        | 1 699                                       | 348 (20.5)                        | 818 (48.2)                   | 40.8 (10.6) 20-60                                | 755 (44.4)                                           | Not measured                                         | 661 (38.9)                                           | Not measured                                                            |
| DWECS<br>(Denmark)                           | 5 313                                       | 1 168 (22.0)                      | 2 445 (46.0)                 | 41.7 (10.9) 18-69                                | 2 306 (43.4)                                         | 24.6 (3.7)                                           | 2 132 (40.1)                                         | 300 (5.7)                                                               |
| FPS<br>(Finland)                             | 42 401                                      | 6 778 (16.0)                      | 34 035 (80.3)                | 44.3 (9.4) 17-64                                 | 7643 (18.0)                                          | 25.0 (4.1)                                           | 7 594 (17.9)                                         | 4 339 (10.2)                                                            |
| Gazel<br>(France)                            | 10 700                                      | 1 530 (14.3)                      | 2 889 (27.0)                 | 50.3 (3.0) 43-58                                 | 1 191 (11.1)                                         | 25.4 (3.5)                                           | 1 929 (18.0)                                         | 1972 (18.4)                                                             |
| HeSSup<br>(Finland)                          | 14 689                                      | 2595 (17.7)                       | 8 234 (56.1)                 | 39.4 (10.3) 20-54                                | 3 729 (25.4)                                         | 24.8 (3.9)                                           | 3 866 (26.3)                                         | 1 448 (9.9)                                                             |
| IPAW<br>(Denmark)                            | 1 880                                       | 325 (17.3)                        | 1 242 (66.1)                 | 41.1 (10.4) 18-68                                | 1 265 (67.3)                                         | 24.2 (3.8)                                           | 567 (30.2)                                           | 133 (7.1)                                                               |
| POLS (the<br>Netherlands)                    | 8 844                                       | 1390 (15.7)                       | 2 956 (33.4)                 | 39.4 (10.9) 15-64                                | 4 114 (46.5)                                         | Measured as<br>categorical <sup>4</sup>              | 3 584 (40.5)                                         | 23 (0.3)                                                                |
| PUMA<br>(Denmark)                            | 1 691                                       | 254 (15.0)                        | 1 386 (82.0)                 | 42.4 (10.2) 18-69                                | 714 (42.2)                                           | 24.5 (3.9)                                           | 663 (39.2)                                           | 111 (6.6)                                                               |
| Still Working<br>(Finland)                   | 8 998                                       | 1405 (15.6)                       | 2 043 (22.7)                 | 40.9 (9.1) 18-65                                 | 6 225 (69.2)                                         | Not measured                                         | 2 974 (33.0)                                         | 423 (4.7) <sup>5</sup>                                                  |
| Whitehall<br>(UK)                            | 10 074                                      | 1402 (13.9)                       | 3 317 (32.9)                 | 44.4 (6.0) 34-56                                 | 2 259 (22.4)                                         | 24.6 (3.6)                                           | 1 853 (18.4)                                         | 1 568 (15.6)                                                            |
| WOLF<br>Norrland<br>(Sweden)                 | 4 468                                       | 566 (12.7)                        | 694 (15.5)                   | 43.9 (10.2) 19-65                                | 2 659 (59.5)                                         | 26.2 (3.6)                                           | 830 (18.6)                                           | 271 (6.1)                                                               |
| WOLF<br>Stockholm<br>(Sweden)                | 5 299                                       | 846 (16.0)                        | 2 224 (42.0)                 | 41.3 (11.0) 19-70                                | 1 585 (29.9)                                         | 24.6 (3.5)                                           | 1 316 (24.8)                                         | 438 (8.2)                                                               |
| All                                          | 116 056                                     | 18 607 (16.0)                     | 62 283 (53.7)                | Median: 41.1<br>Range: 17-70                     | 34 445 (29.7)                                        | 24.9 (3.7)                                           | 27 969 (24.1)                                        | 11 027 (9.5)                                                            |

**Footnotes to Table S1.**

SD: standard deviation.

<sup>1</sup> For study acronyms and details, see Appendix 1.

<sup>2</sup> Participants with complete data on job strain, age, sex, SEP, BMI (not available in Still Working and COPSOQ-I), smoking, alcohol intake and incident cancer events.

<sup>3</sup> Heavy drinkers here defined as participants who consume more than recommended amounts of alcohol:  $\geq 15$  (women)  $\geq 22$  (men) units/week.

<sup>4</sup> BMI was recorded in categories in POLS. N (%) normal weight: 5 434 (61,4)

<sup>5</sup> This is an approximation. We were unable to ascertain number of drinks per time period in Still Working due to the way alcohol intake was asked in the baseline questionnaire. These data are based on participants' responses to the question "How often do you drink alcohol".
