# Supplementary material
Source: PubMed Central journal article supplement (PMC4790833)
Supplement: heik007385.ww4_default.pdf [file heik007385.ww4_default.pdf]

## Appendix 4. Meta-analyses [posted as supplied by author]

Figure S2. Age and sex-adjusted associations of job strain and overall cancer risk, including and excluding non-melanoma skin cancer (ICD-10 code: C44)

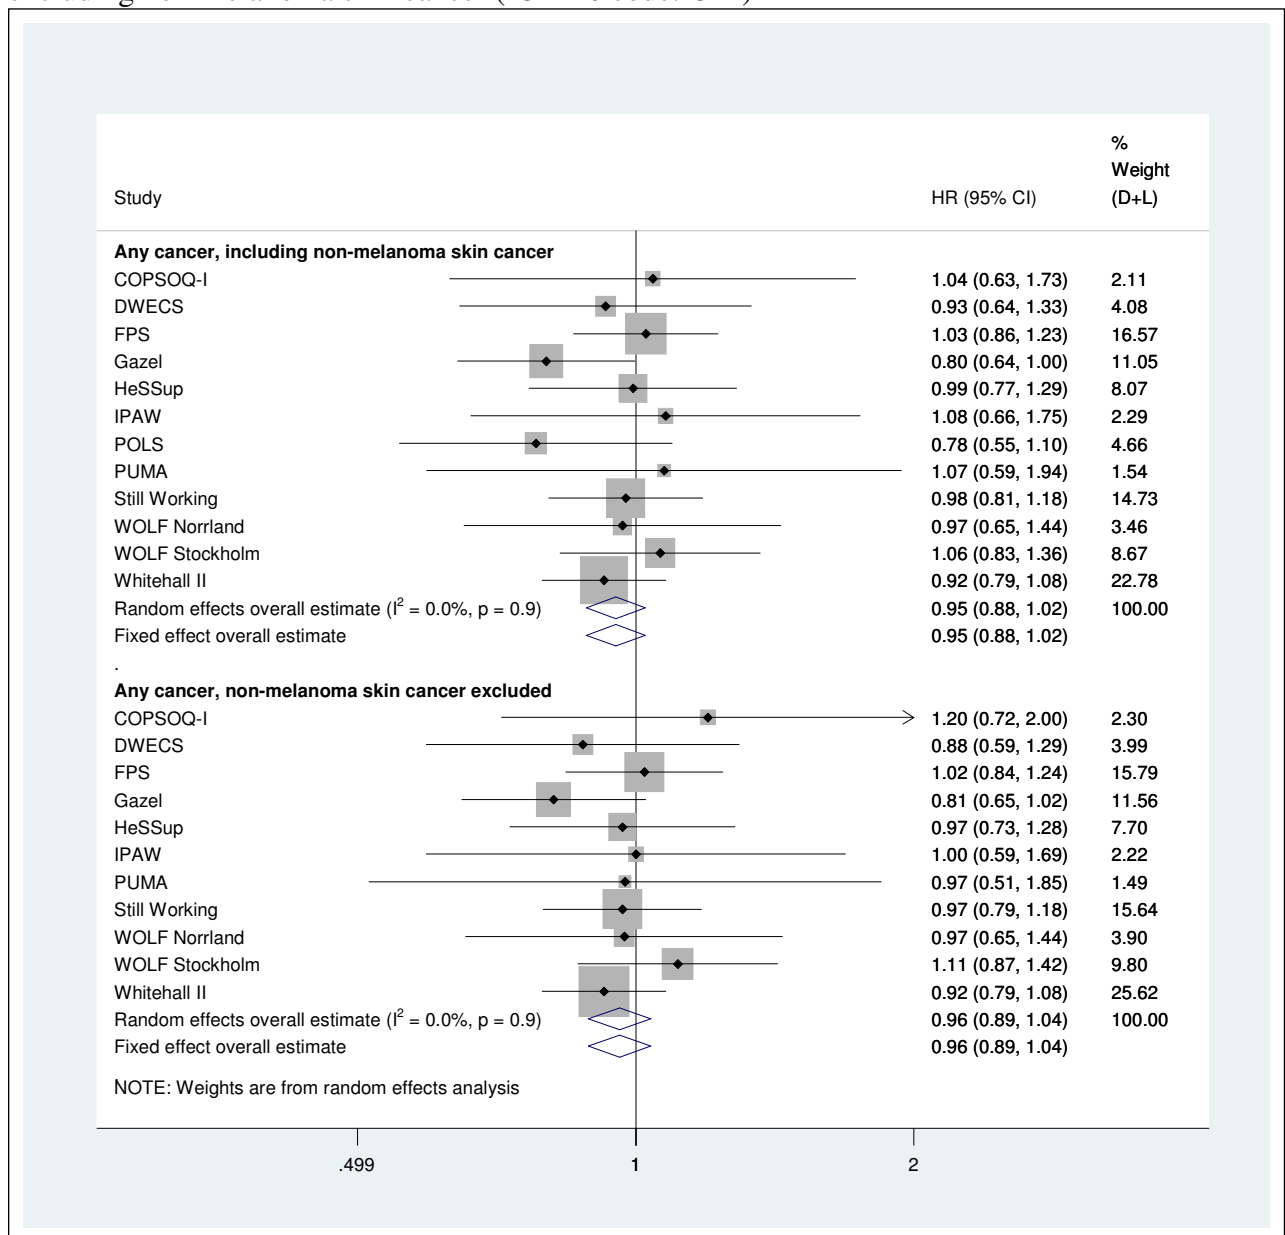

HR: hazard ratio, D+L: Der Simonian and Laird

Figure S3. Multivariable-adjusted associations of job strain and overall cancer risk, including and excluding non-melanoma skin cancer (ICD-10 code: C44)

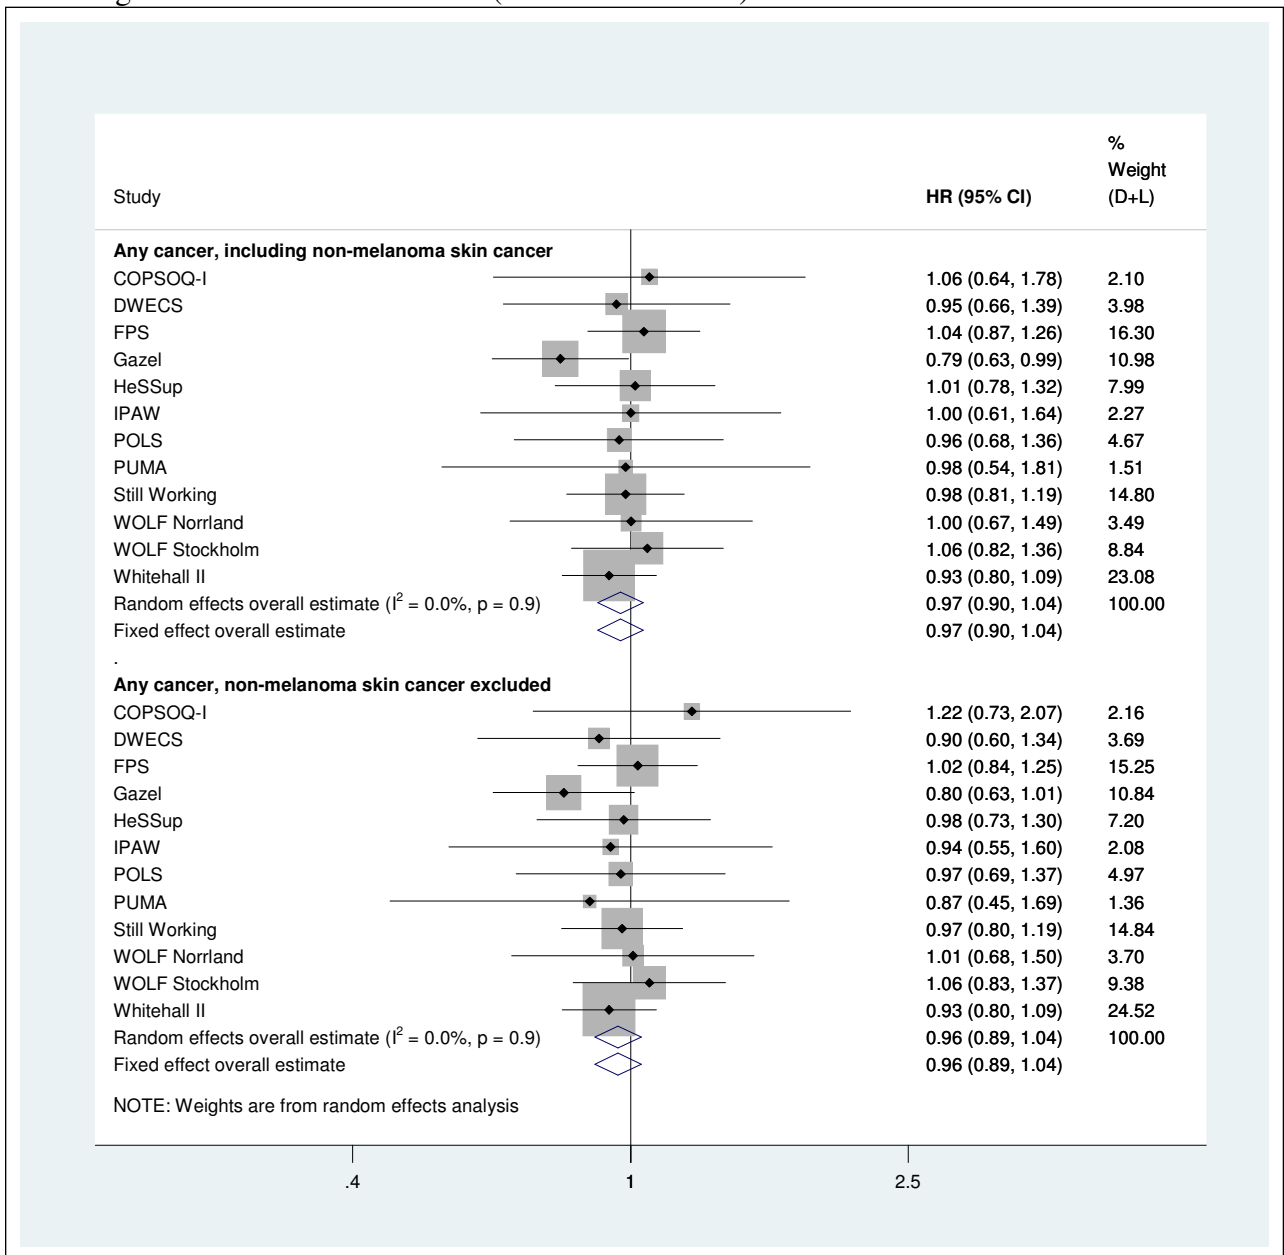

HR: hazard ratio, D+L: Der Simonian and Laird

Figure S4A. Age and sex-adjusted associations of job strain quadrants with overall cancer risk

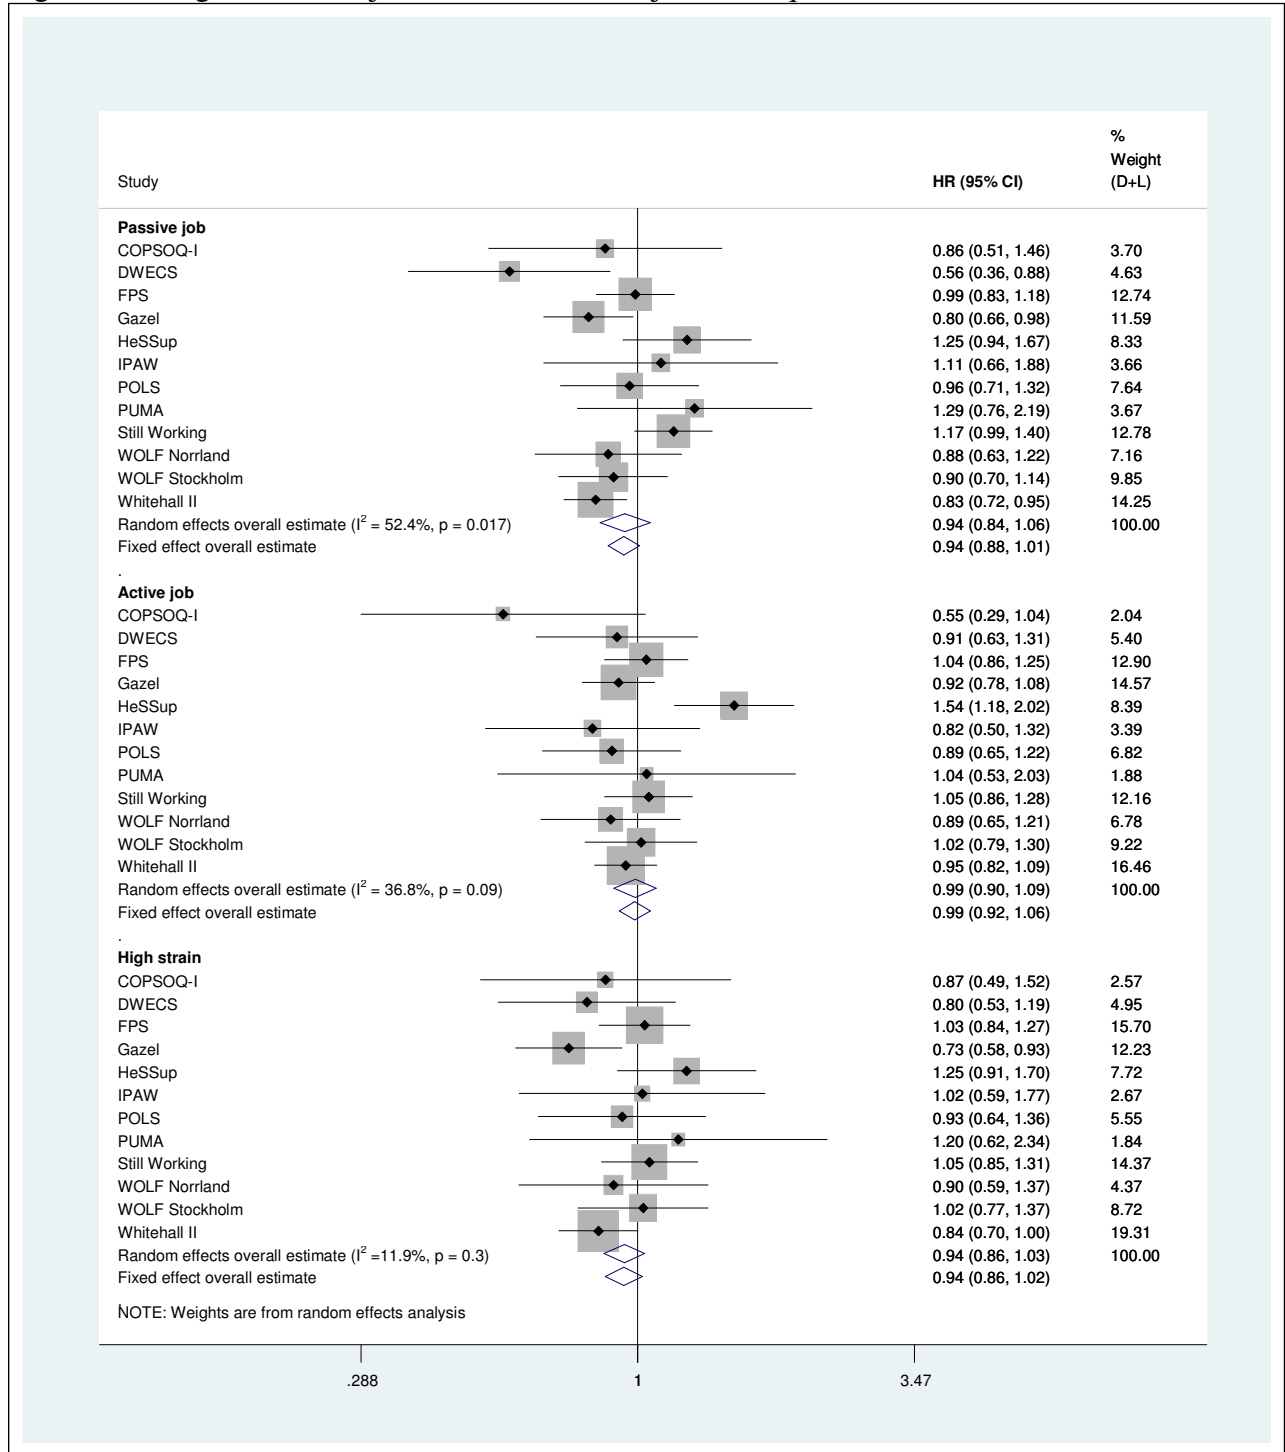

HR: hazard ratio, D+L: Der Simonian and Laird

Figure S4B. Multivariable-adjusted associations of job strain quadrants with overall cancer risk

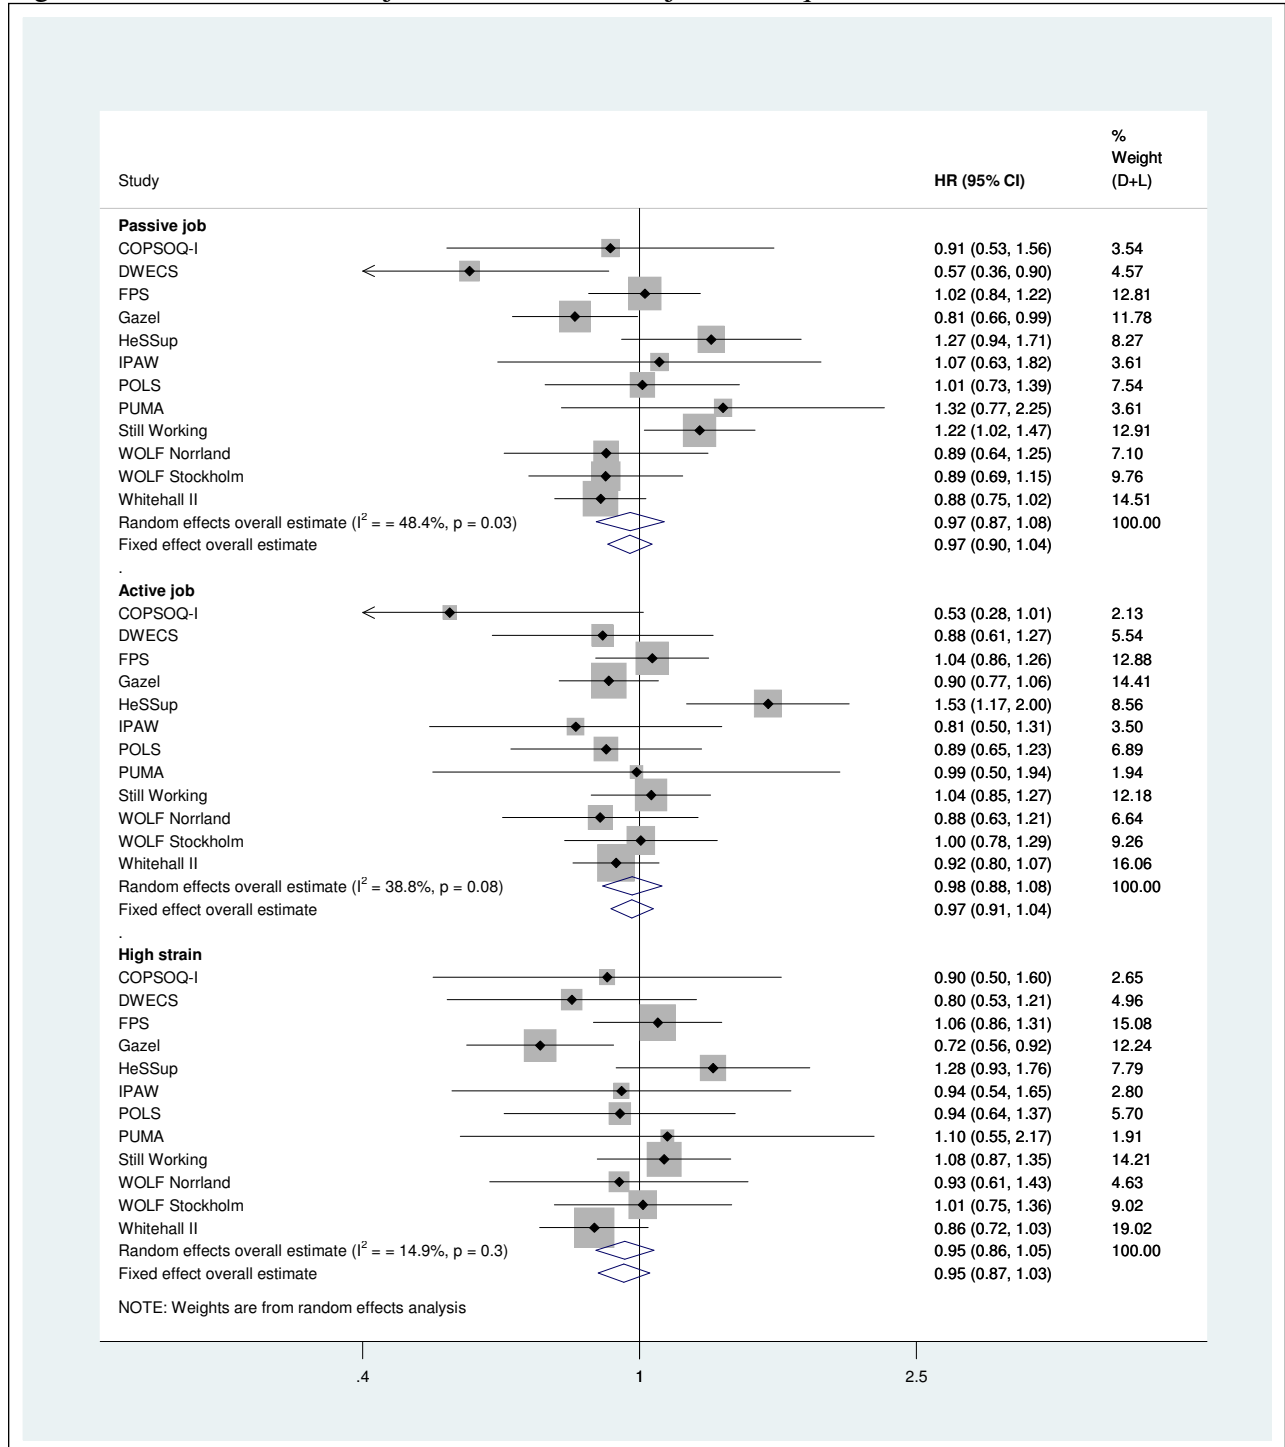

HR: hazard ratio, D+L: Der Simonian and Laird

Figure S5A. Age and sex-adjusted associations of job strain quadrants with overall cancer risk, with non-melanoma skin cancer (C44) excluded

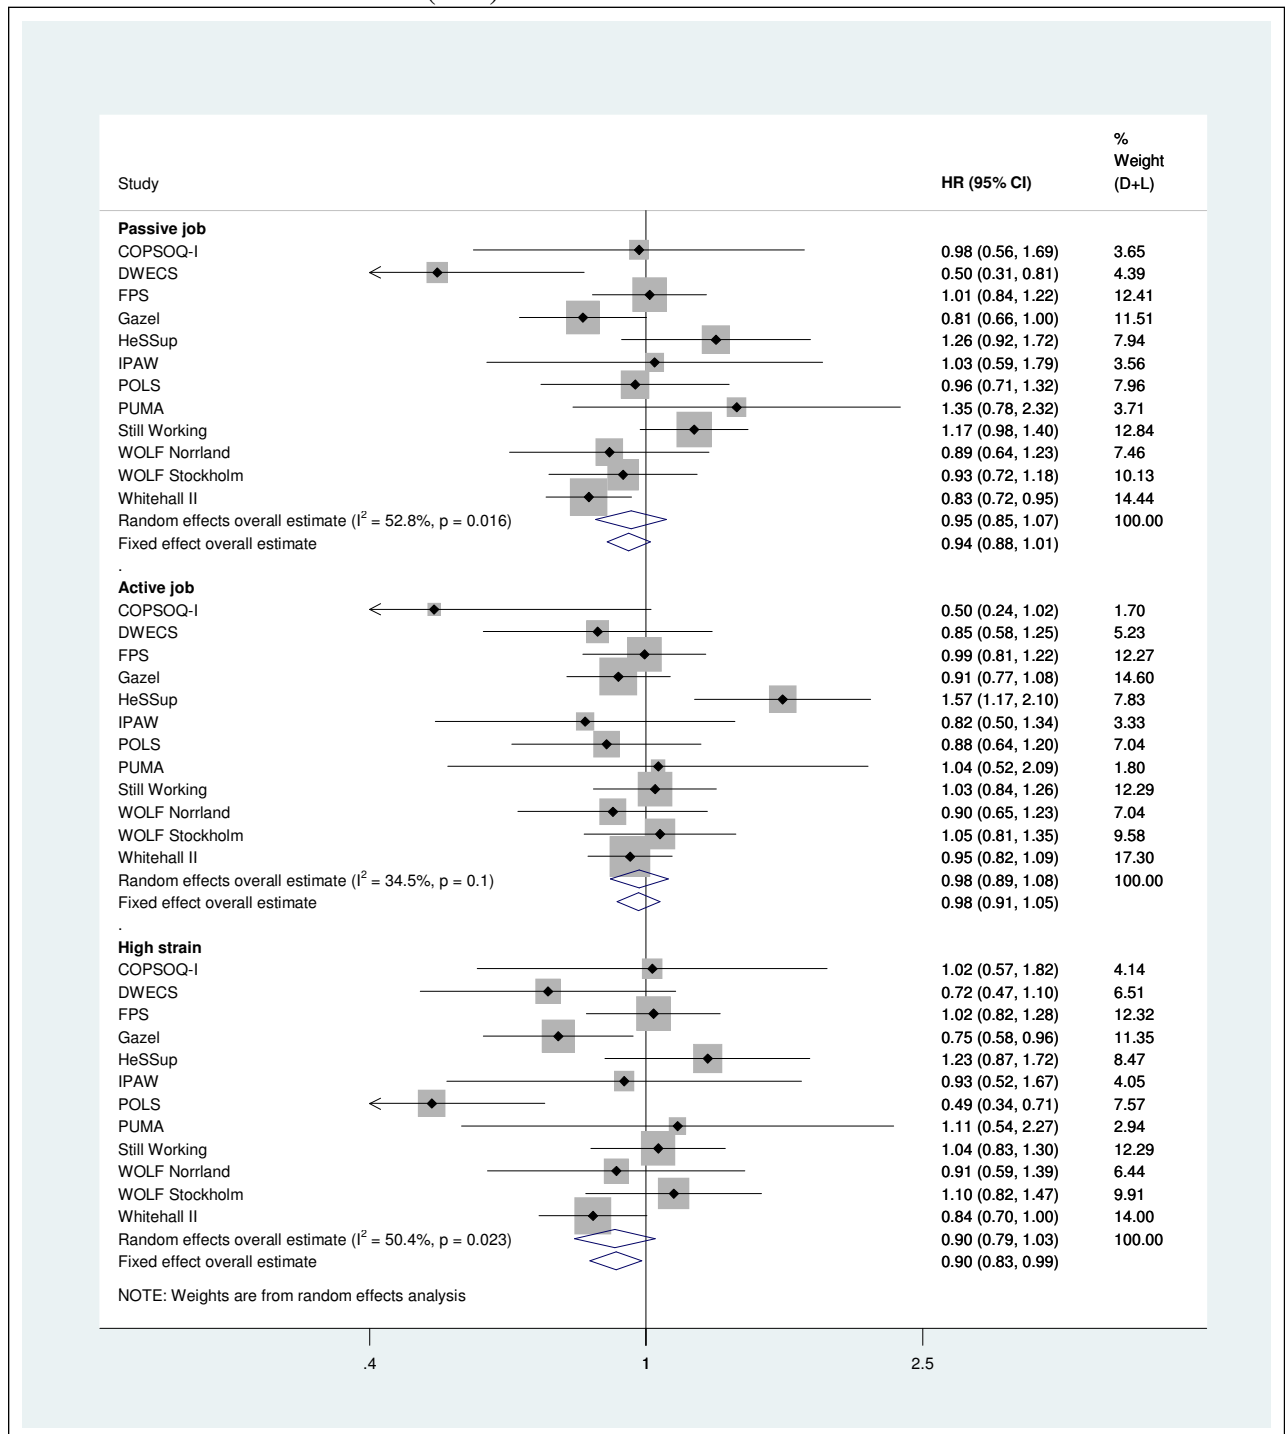

HR: hazard ratio, D+L: Der Simonian and Laird

Figure S5B. Multivariable-adjusted associations of job strain quadrants with overall cancer risk, with non-melanoma skin cancer (C44) excluded

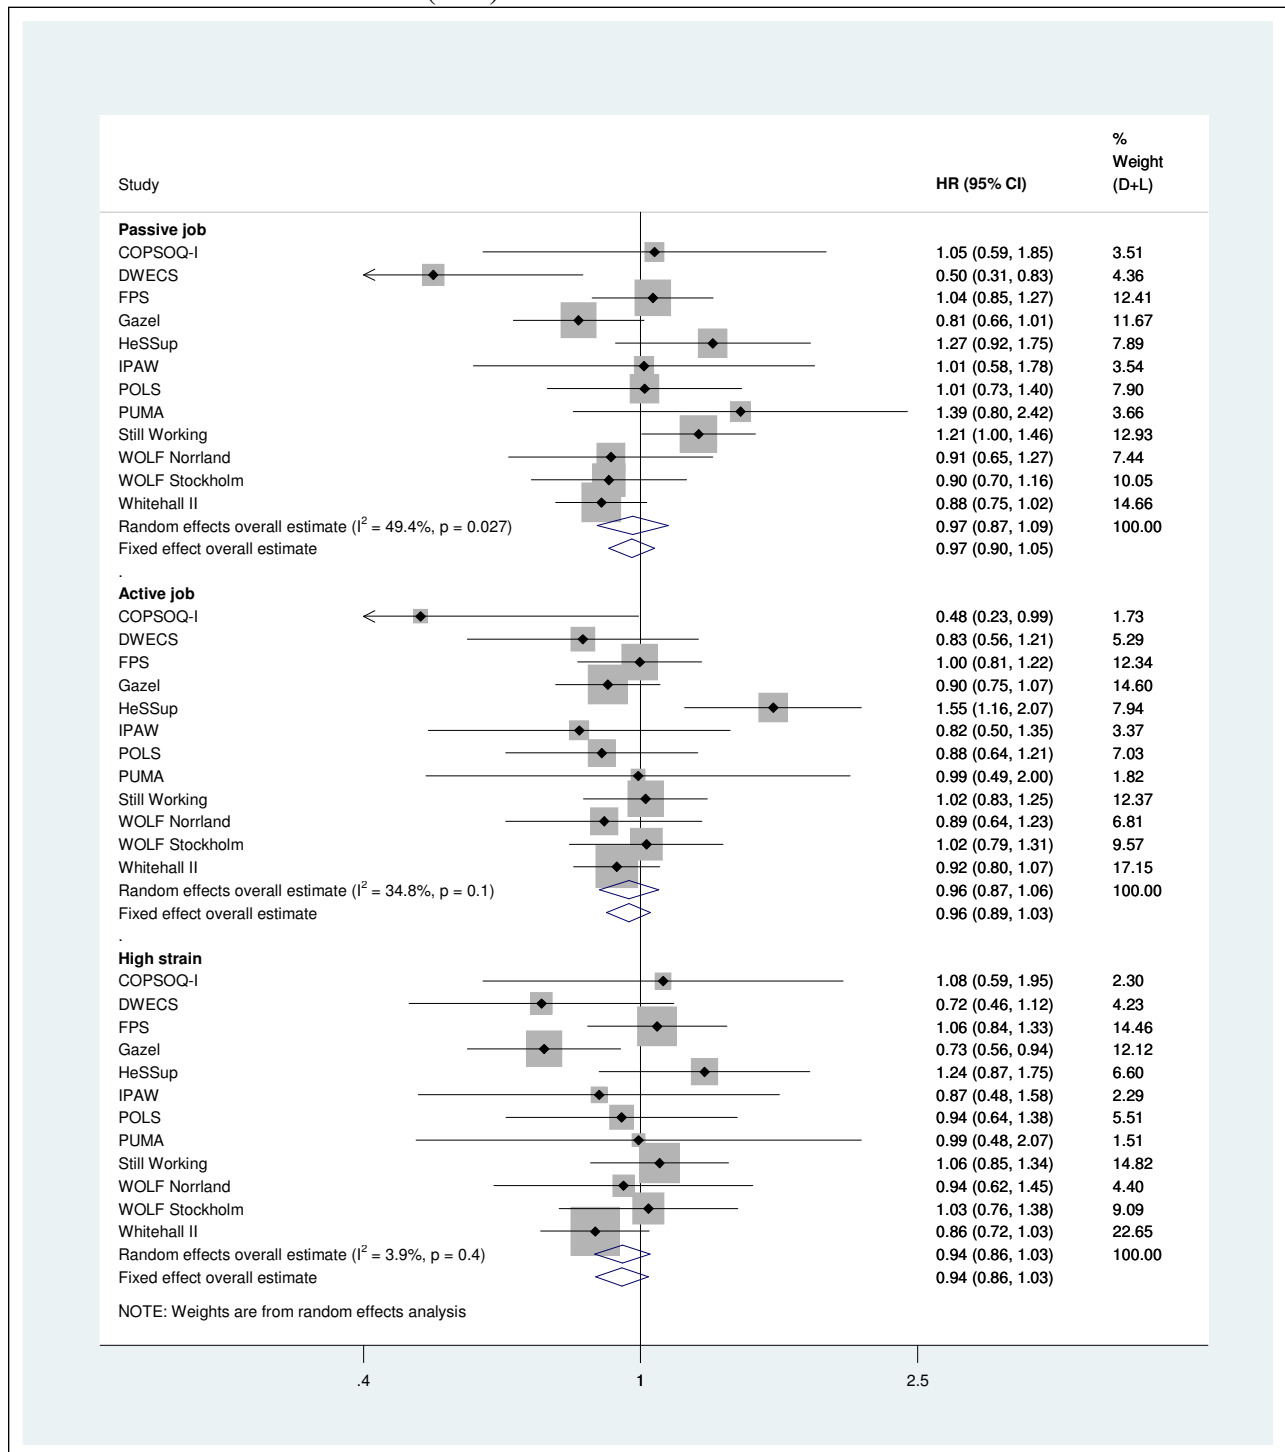

HR: hazard ratio, D+L: Der Simonian and Laird

Figure S6A. Age and sex-adjusted associations of job strain quadrants with colorectal cancer risk

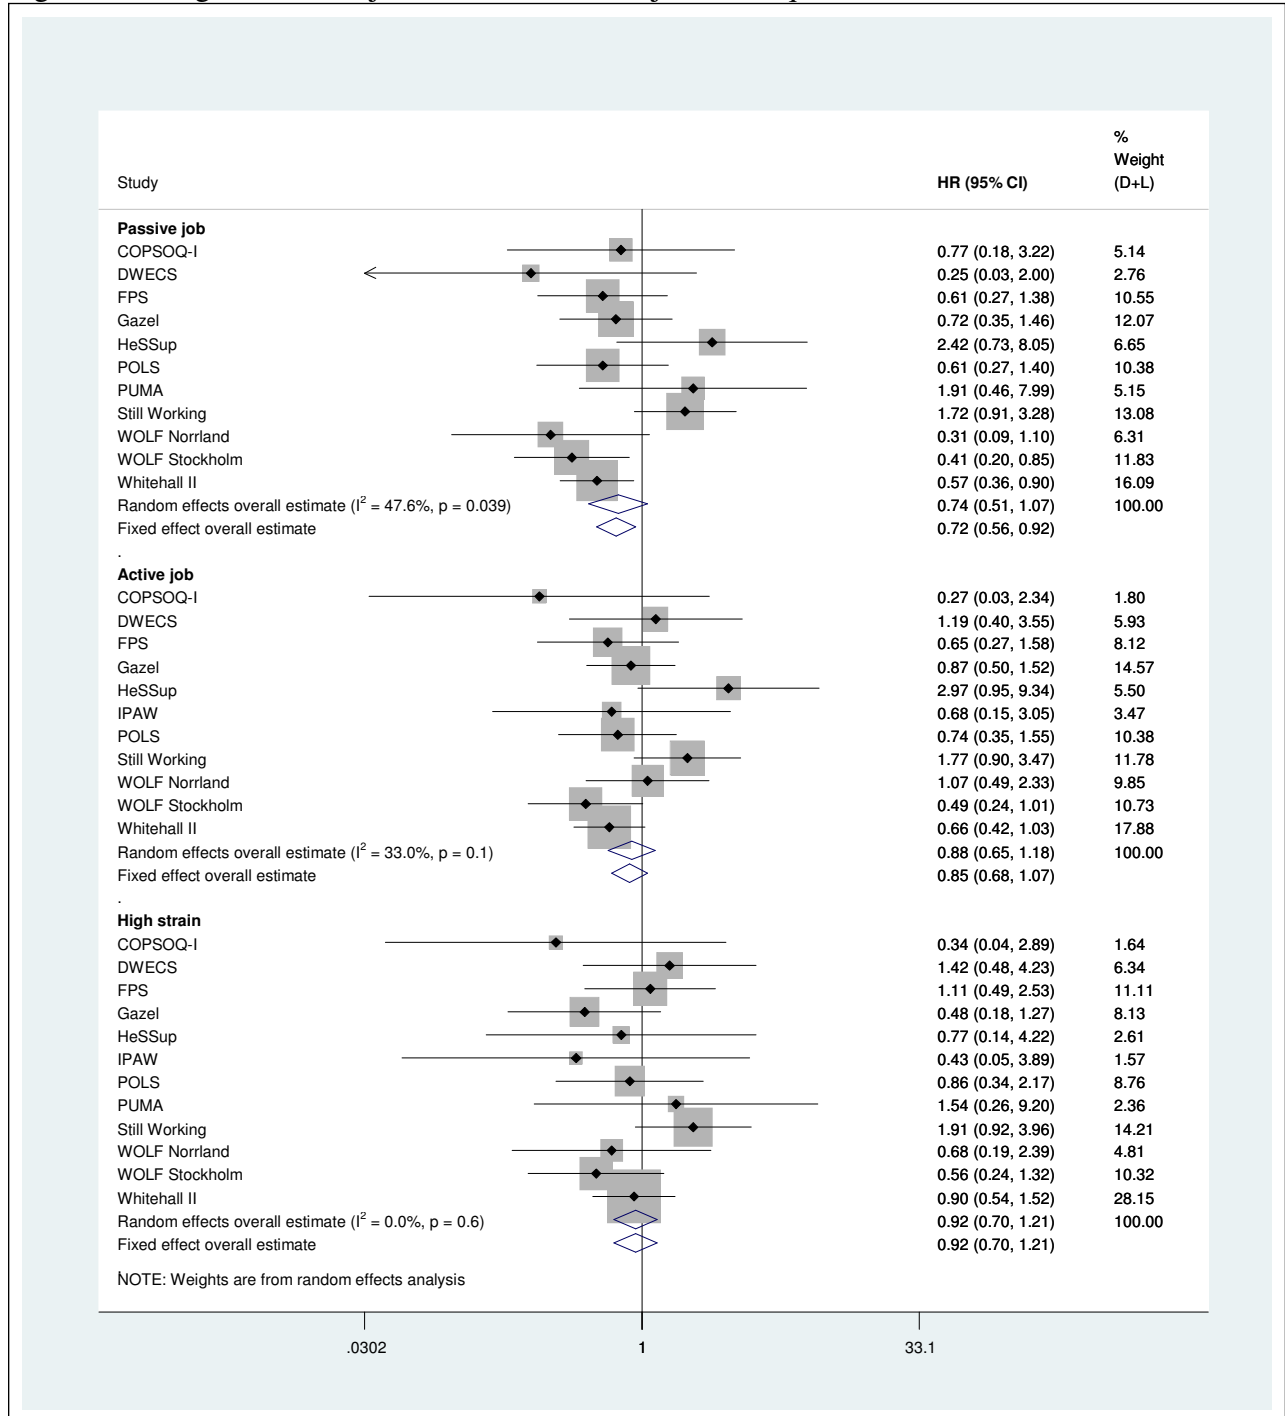

HR: hazard ratio, D+L: Der Simonian and Laird

Figure S6B. Multivariable-adjusted associations of job strain quadrants with colorectal cancer risk

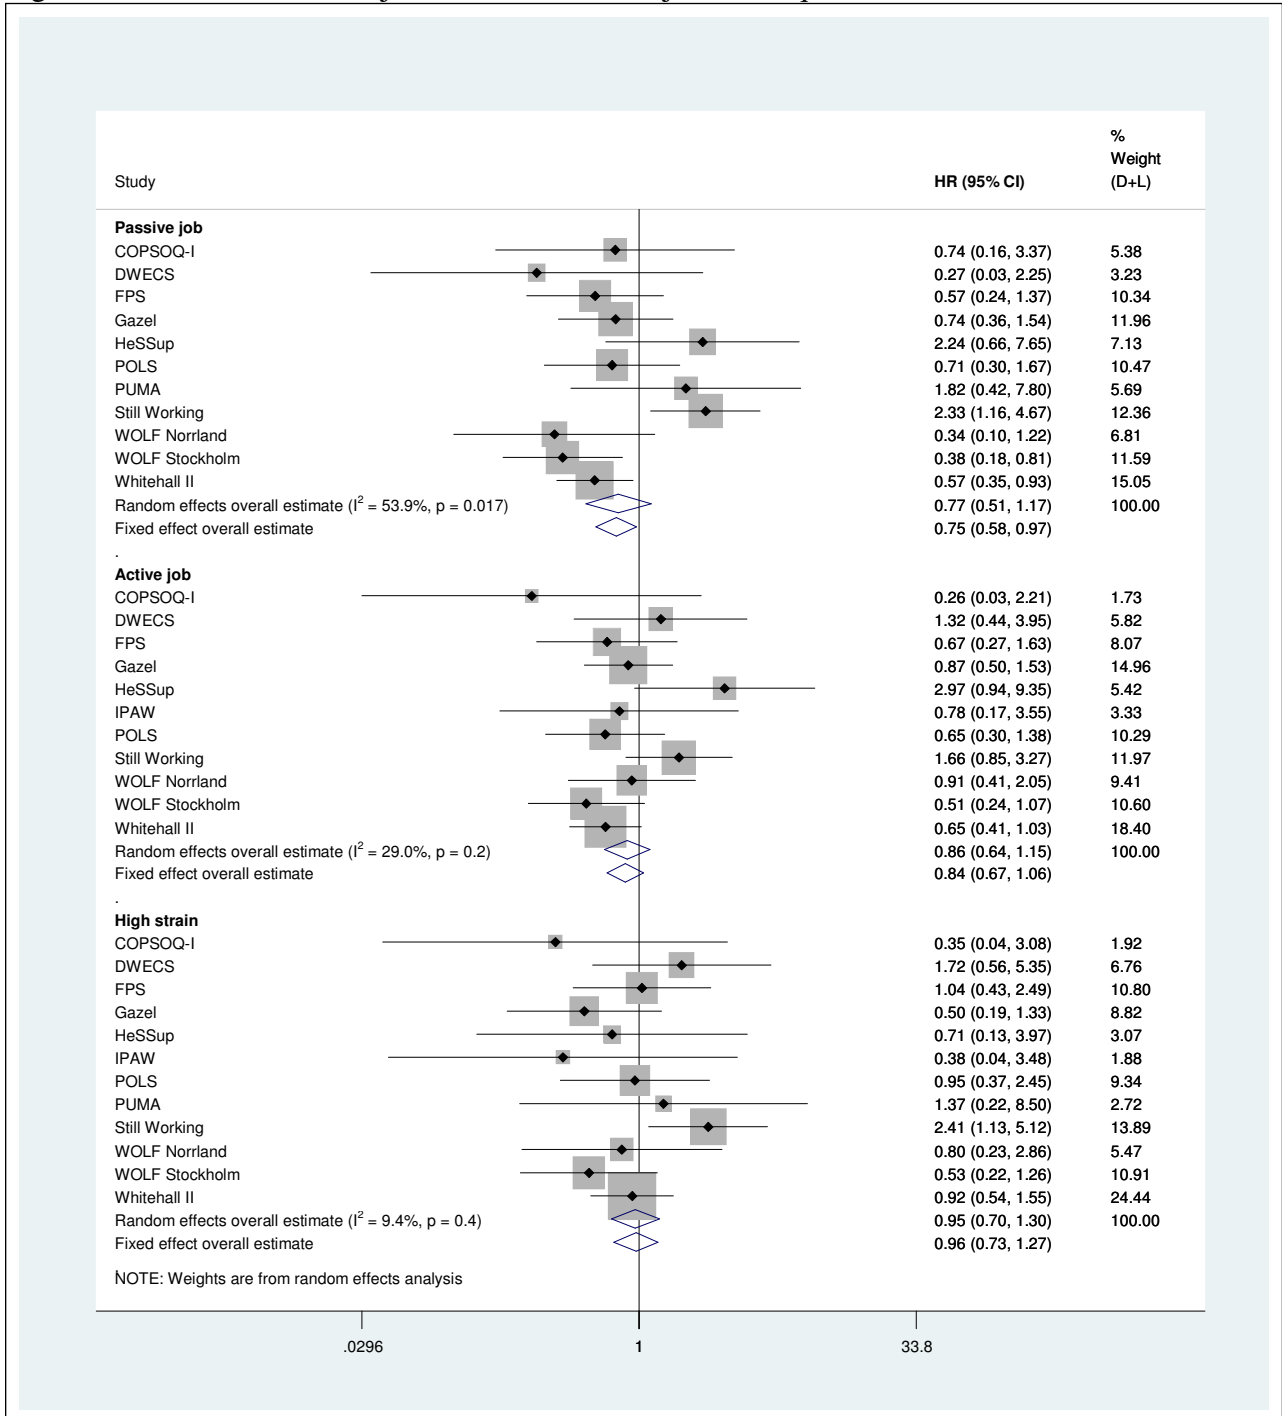

HR: hazard ratio, D+L: Der Simonian and Laird



Figure S7A. Age and sex-adjusted associations of job strain quadrants with lung cancer risk

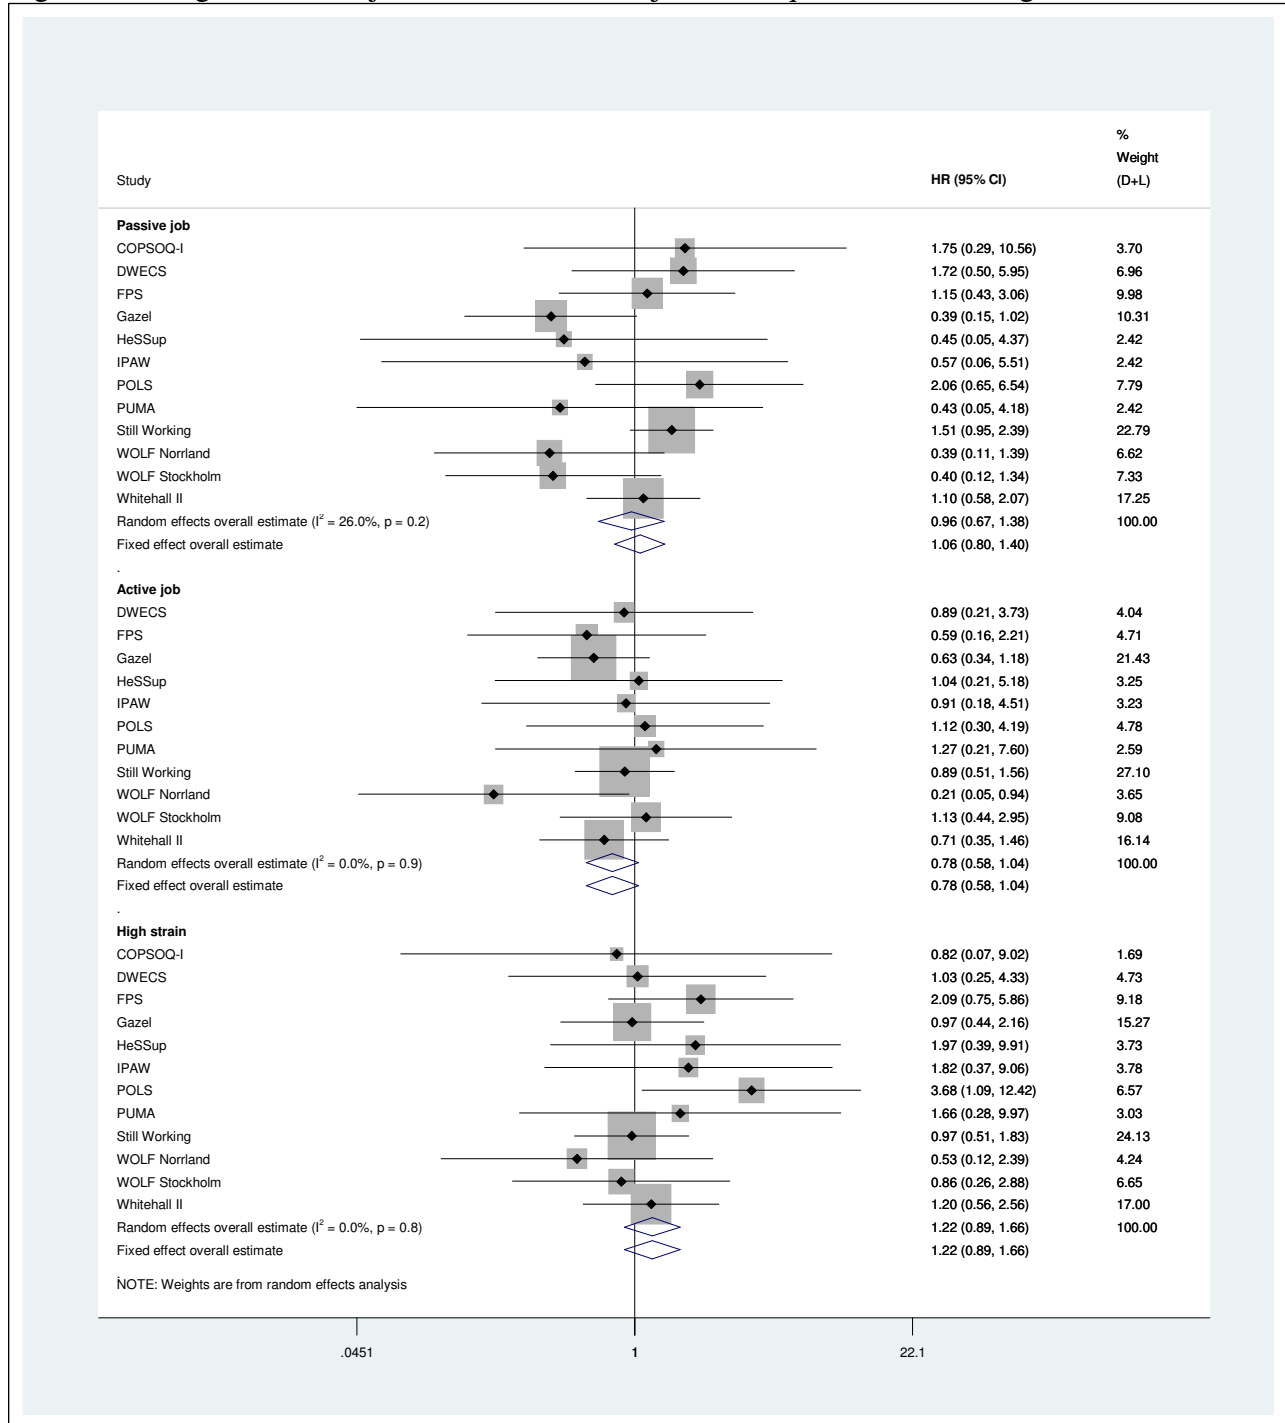

HR: hazard ratio, D+L: Der Simonian and Laird

Figure S7B. Multivariable-adjusted associations of job strain quadrants with lung cancer risk

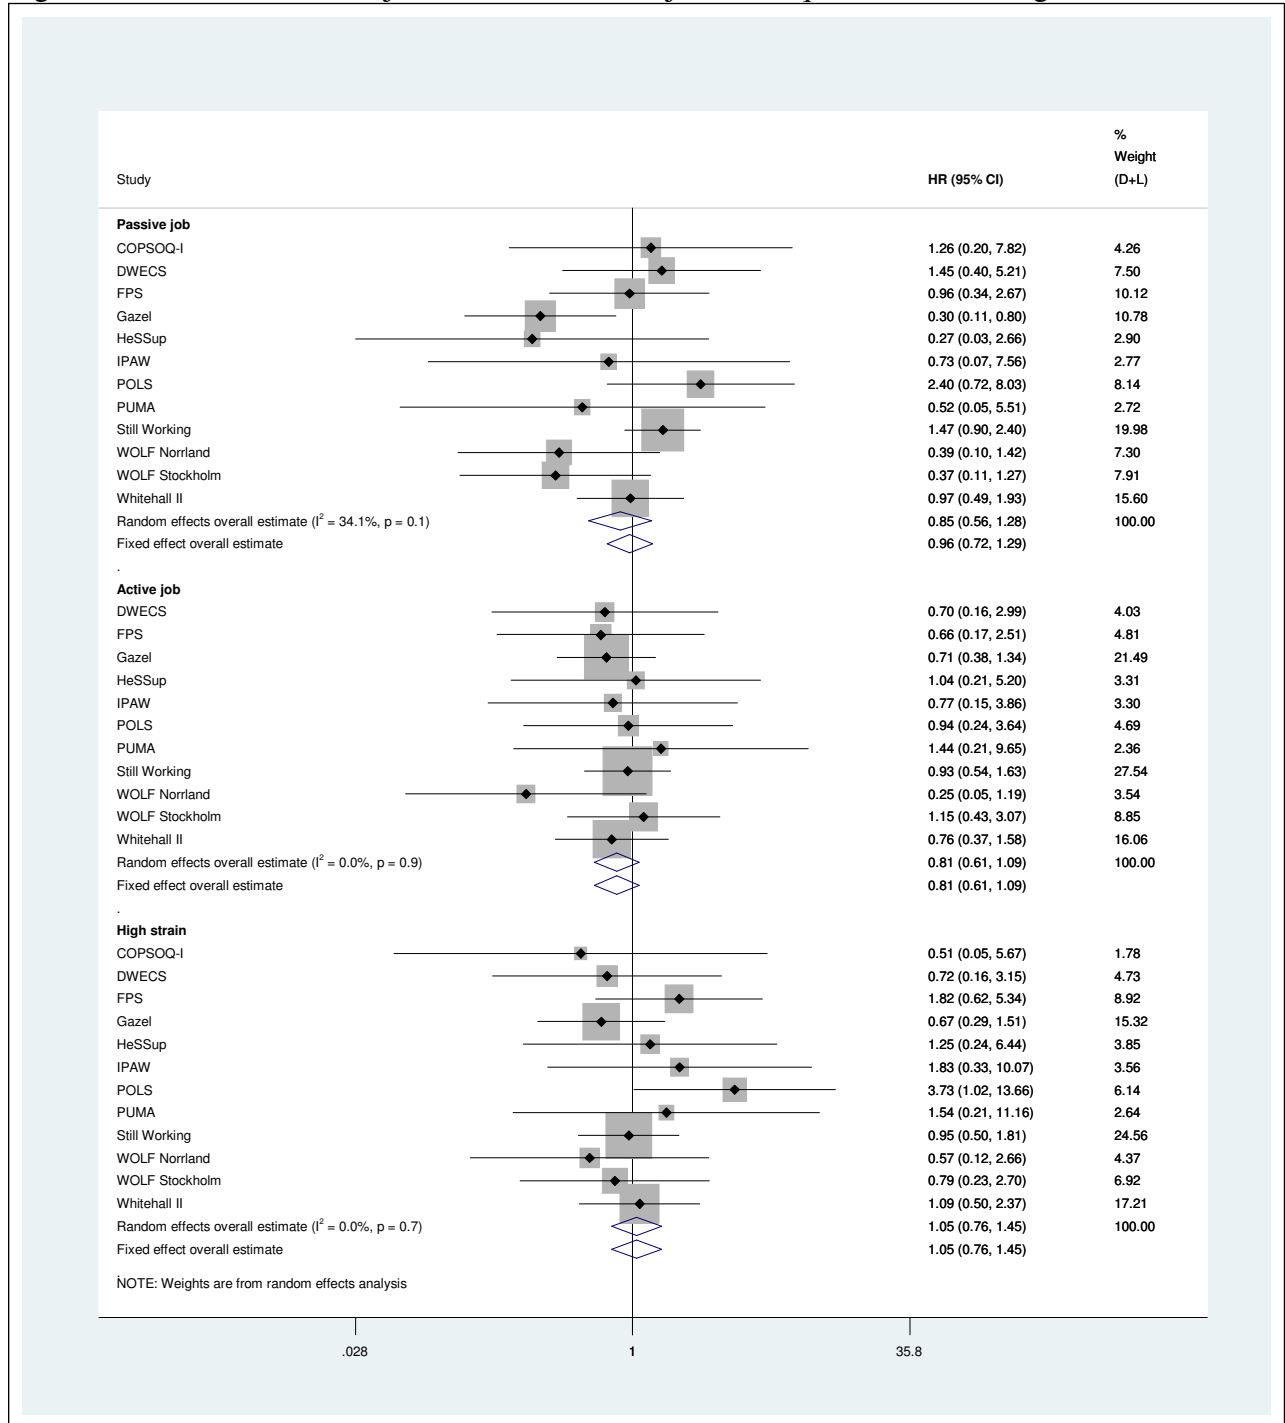

HR: hazard ratio, D+L: Der Simonian and Laird

Figure S8A. Age and sex-adjusted associations of job strain quadrants with breast cancer risk, including all studies

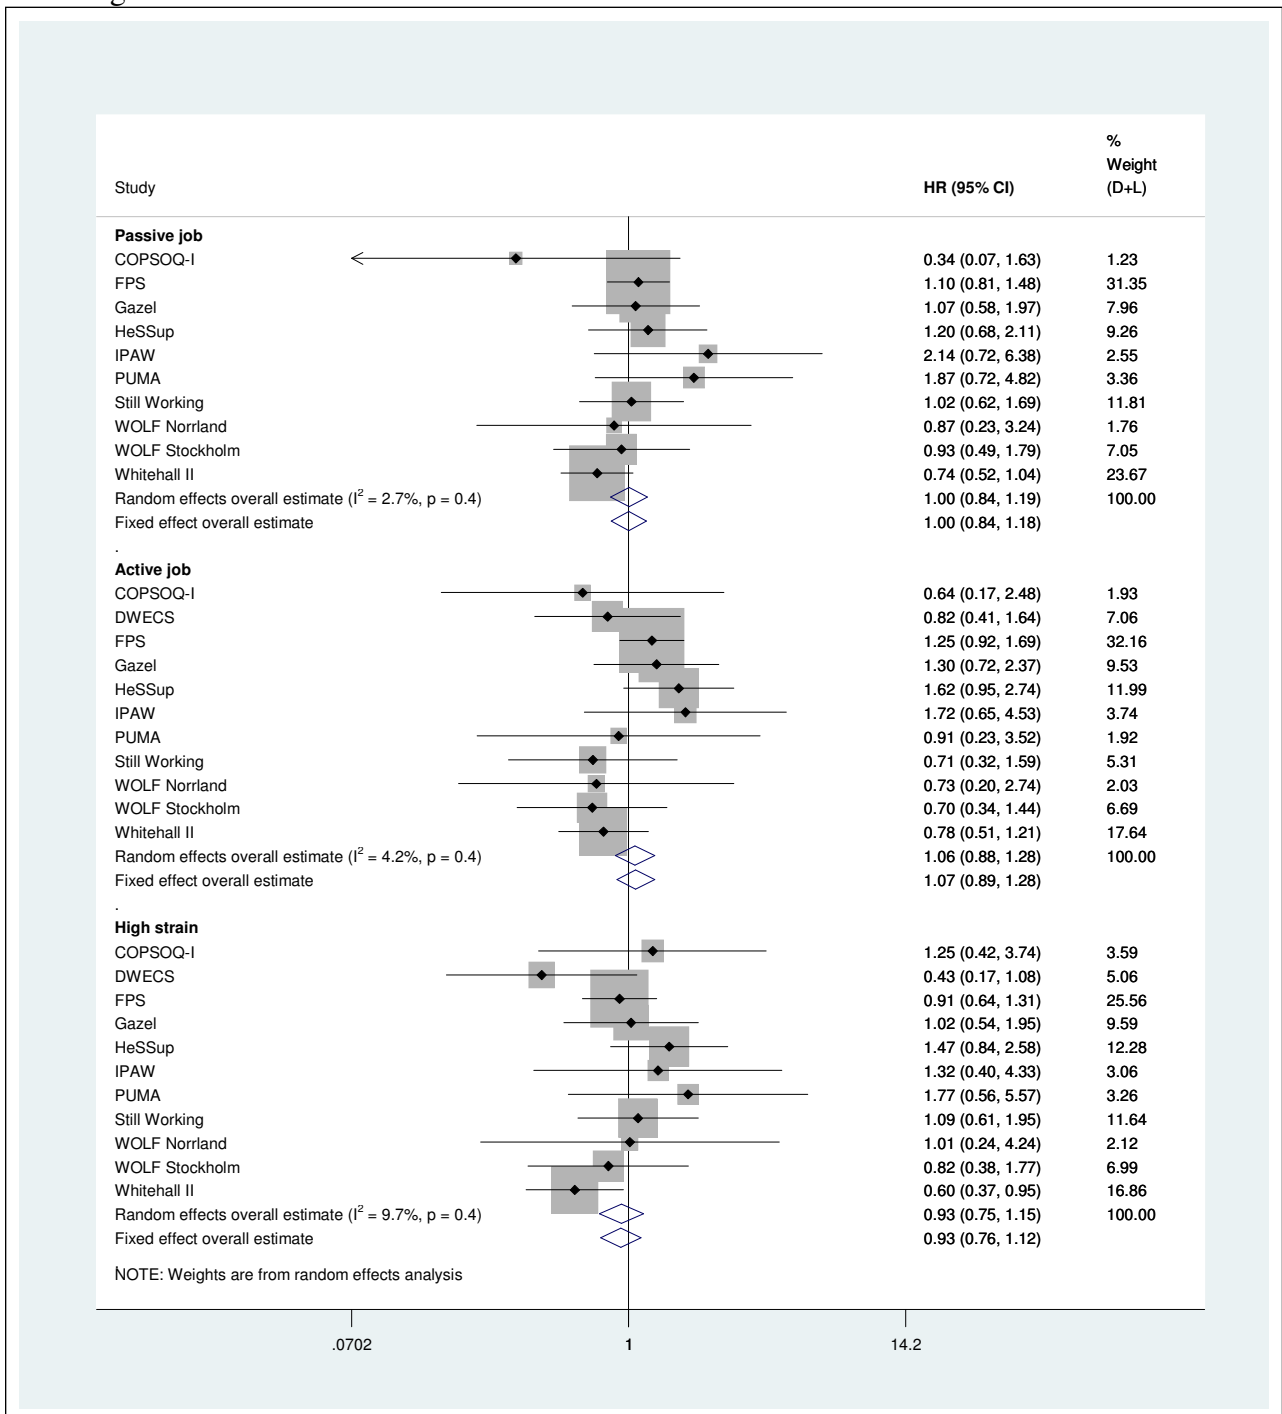

HR: hazard ratio, D+L: Der Simonian and Laird

Figure S8B. Multivariable-adjusted associations of job strain quadrants with breast cancer risk, including all studies

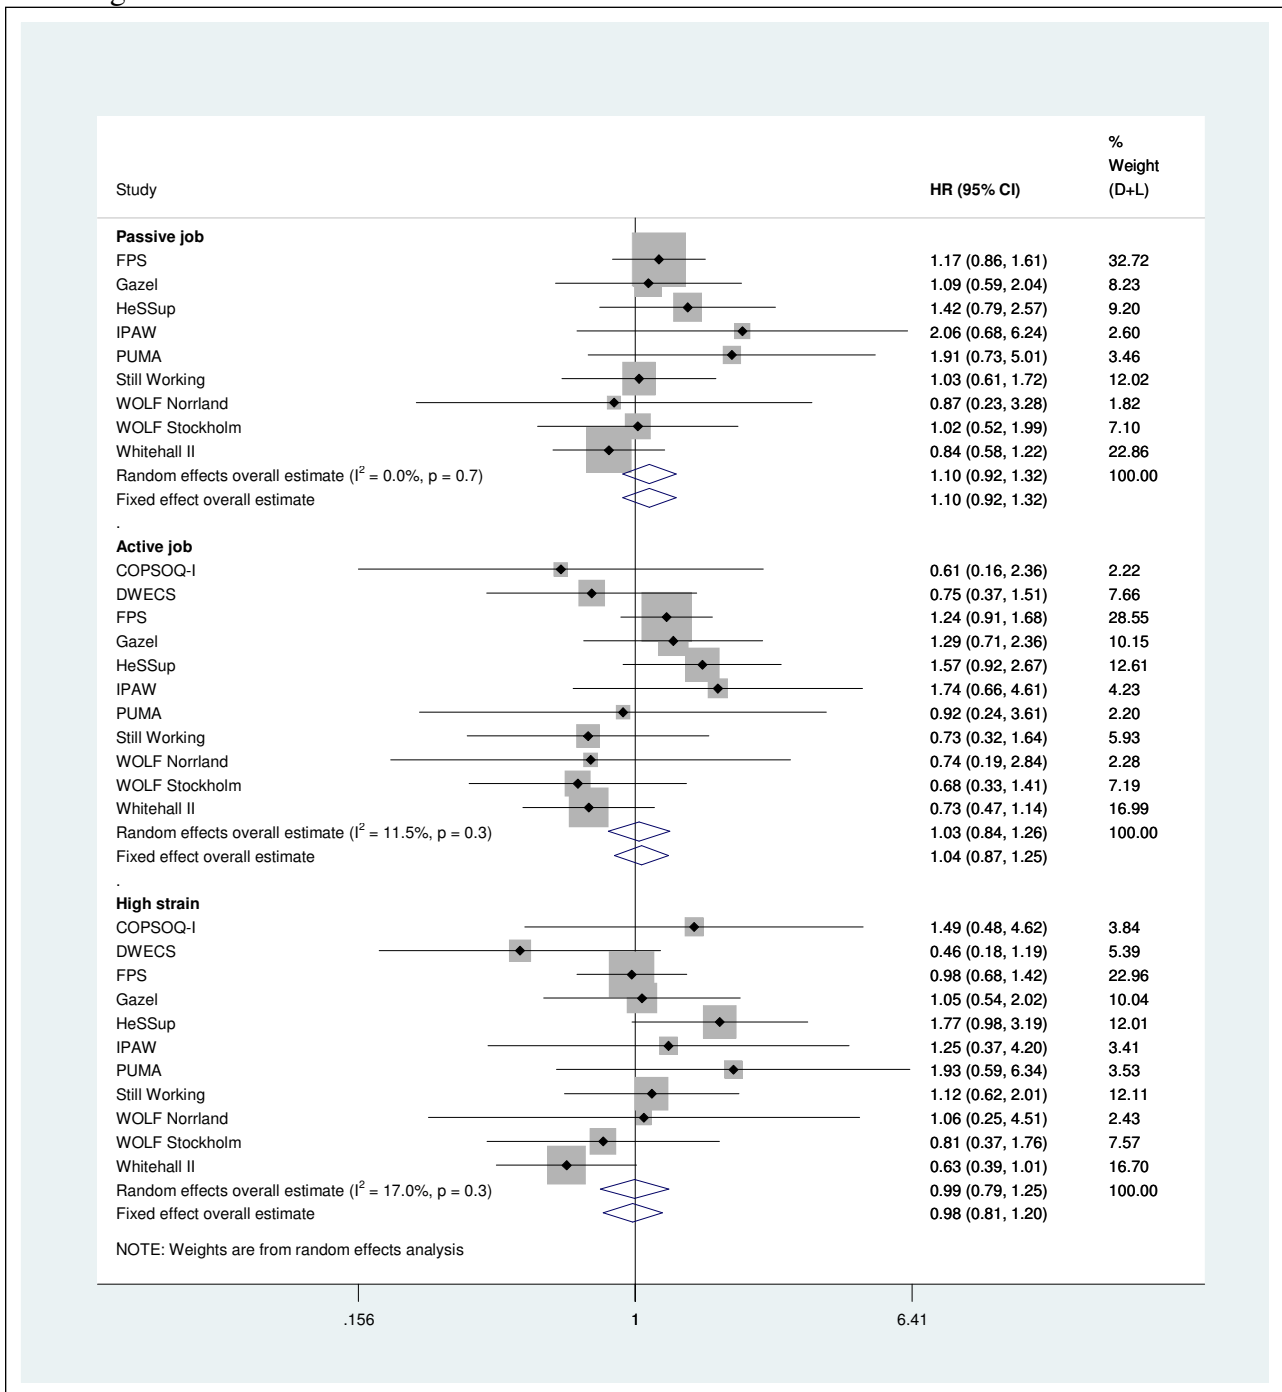

HR: hazard ratio, D+L: Der Simonian and Laird

Figure S8C. Multivariable-adjusted associations of job strain quadrants with breast cancer risk, excluding Still Working and COPSOQ-I, in which body mass index could not be adjusted for

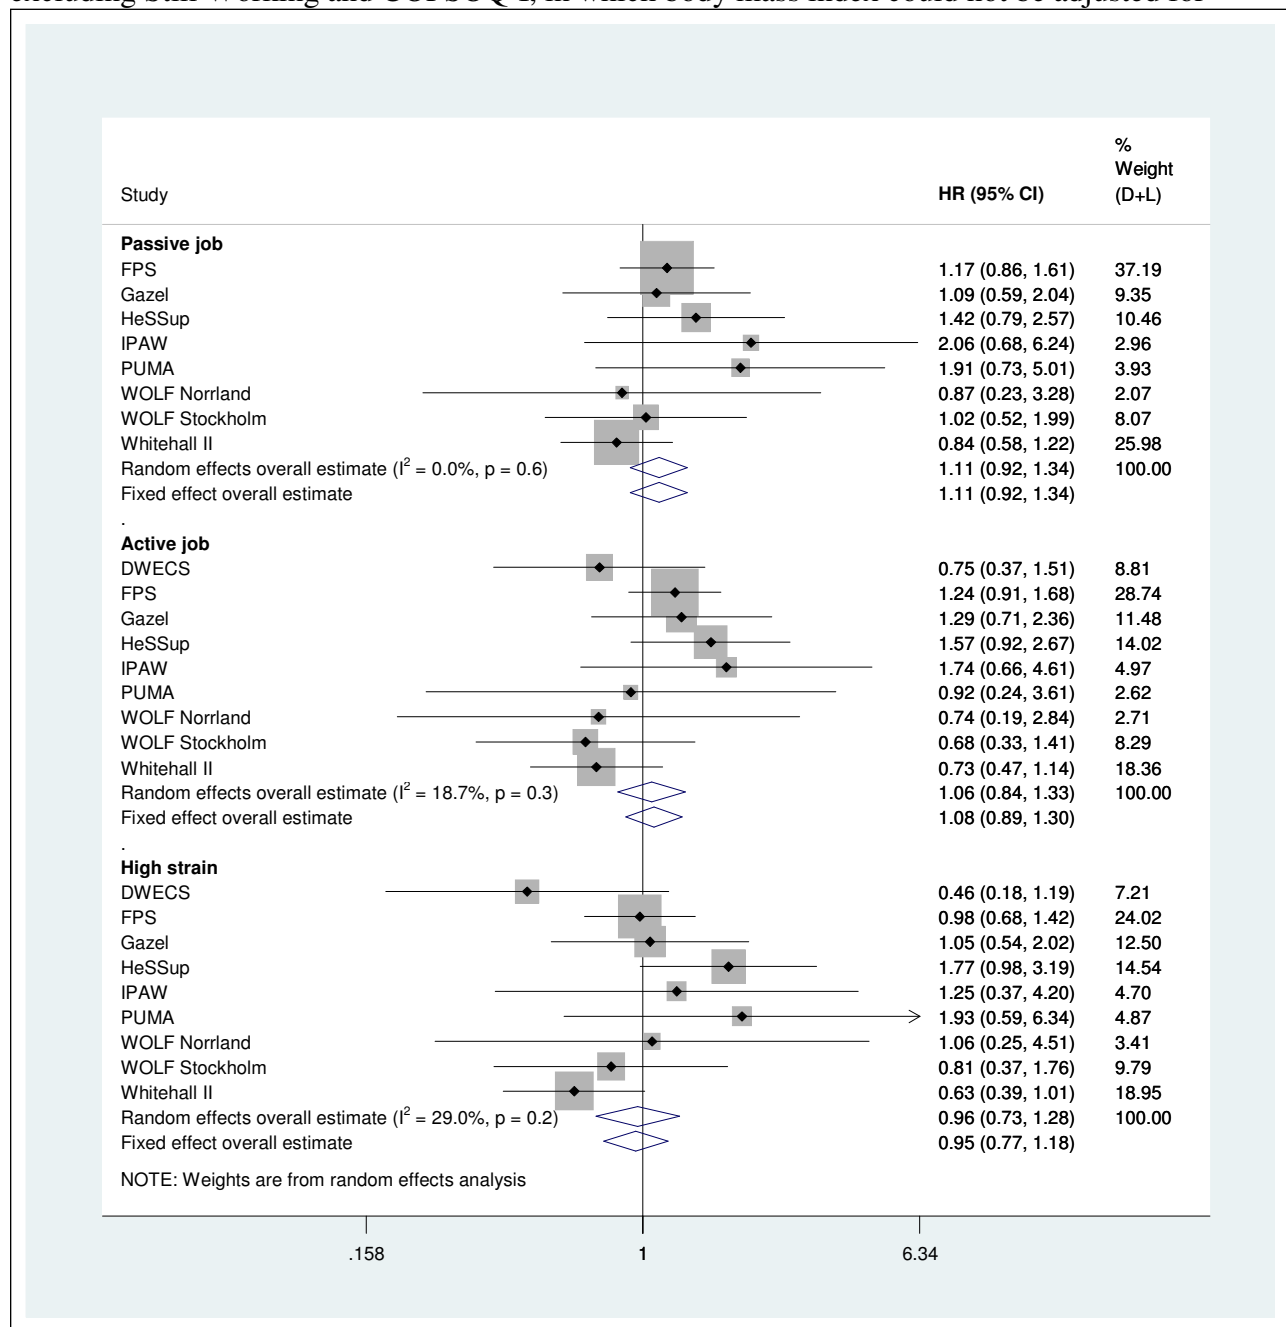

HR: hazard ratio, D+L: Der Simonian and Laird

### **Previous studies of job strain and incident breast cancer**

Figure S8D shows the associations of work-related stress and breast cancer risk from our analysis and previously published findings from three large studies. Two previous prospective studies of job strain and breast cancer risk were identified from a systematic review by Antonova and colleagues<sup>1</sup>. Multivariable-adjusted analyses using data from large prospective cohort studies carried out in the US and Sweden had inconsistent findings. In the Nurses' Health Study (n= 37 562, n incident breast cancer=1030), job strain was not associated with breast cancer risk<sup>2</sup>. In the Women's Lifestyle and Health Cohort Study (n=20 042, n incident breast cancer=468), however, high job strain was associated with a slight increase in breast cancer risk<sup>3</sup>. Breast cancer was ascertained from registry data in Women's Lifestyle and Health Cohort Study<sup>3</sup> and from registry data and medical records review in Nurses' Health Study<sup>2</sup>. In the Women's Lifestyle and Health Cohort Study<sup>3</sup>, incident breast cancer cases diagnosed during the first year of follow-up were excluded but in Nurses' Health Study analyses included all incident breast cancer cases in the analyses. Combining the findings of these studies and ours did not markedly change our overall association estimates.

Figure S8D. Multivariable-adjusted associations of job strain quadrants with breast cancer risk, including the findings from the Women's Lifestyle and Health Cohort and the Nurses' Health Study

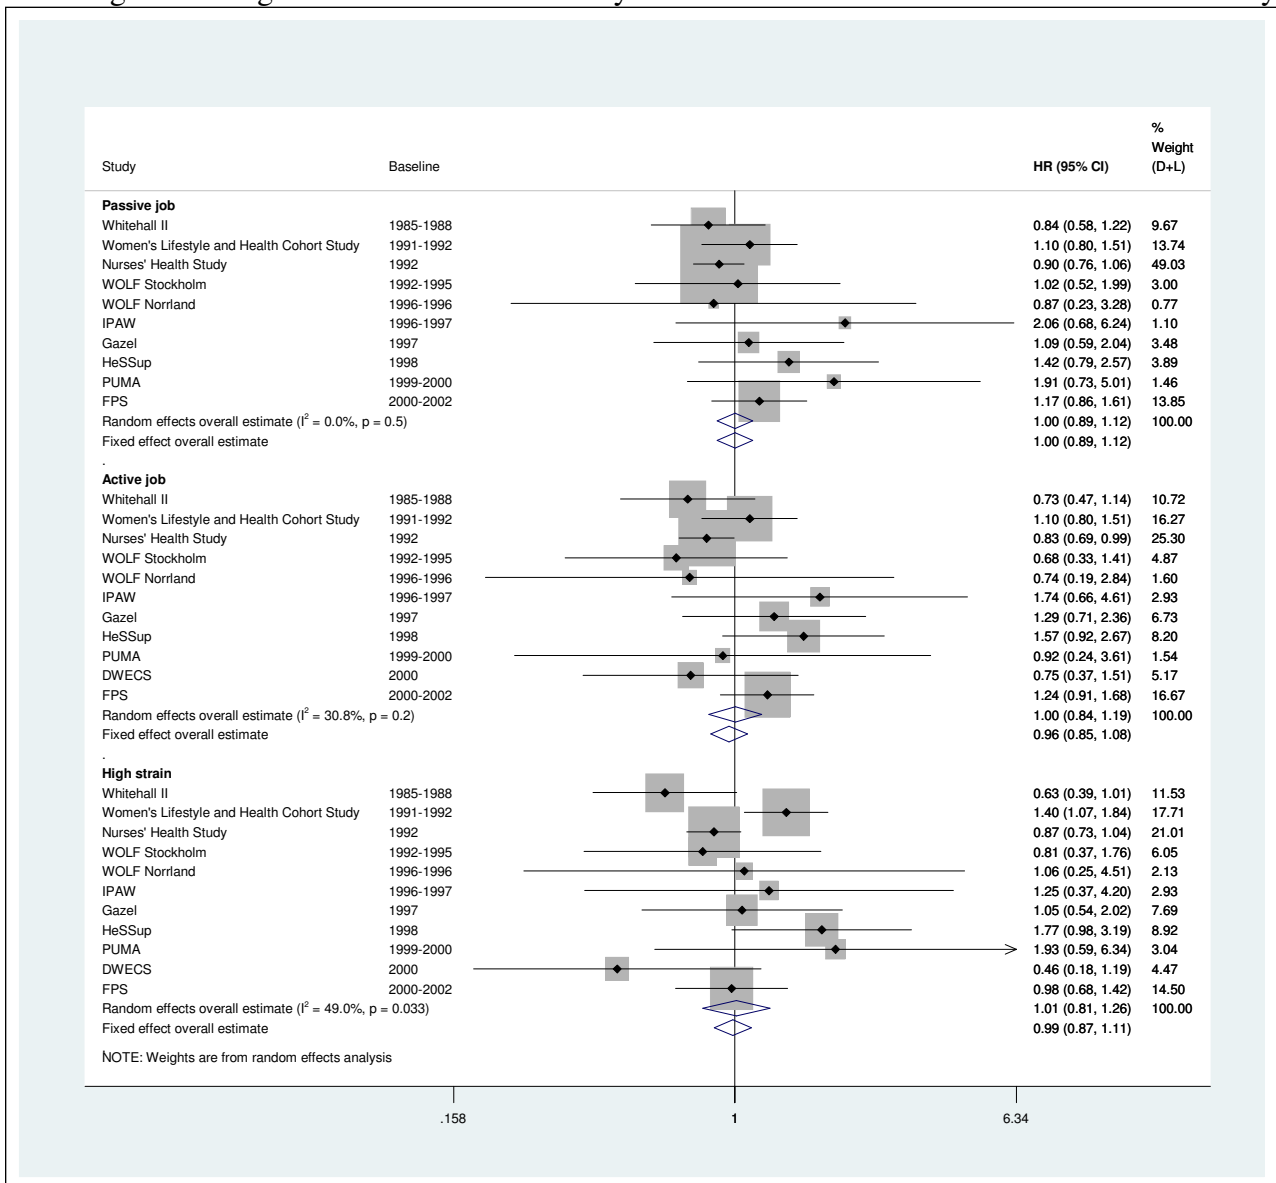

HR: hazard ratio, D+L: Der Simonian and Laird

Figure S9A. Age and sex-adjusted associations of job strain quadrants with prostate cancer risk

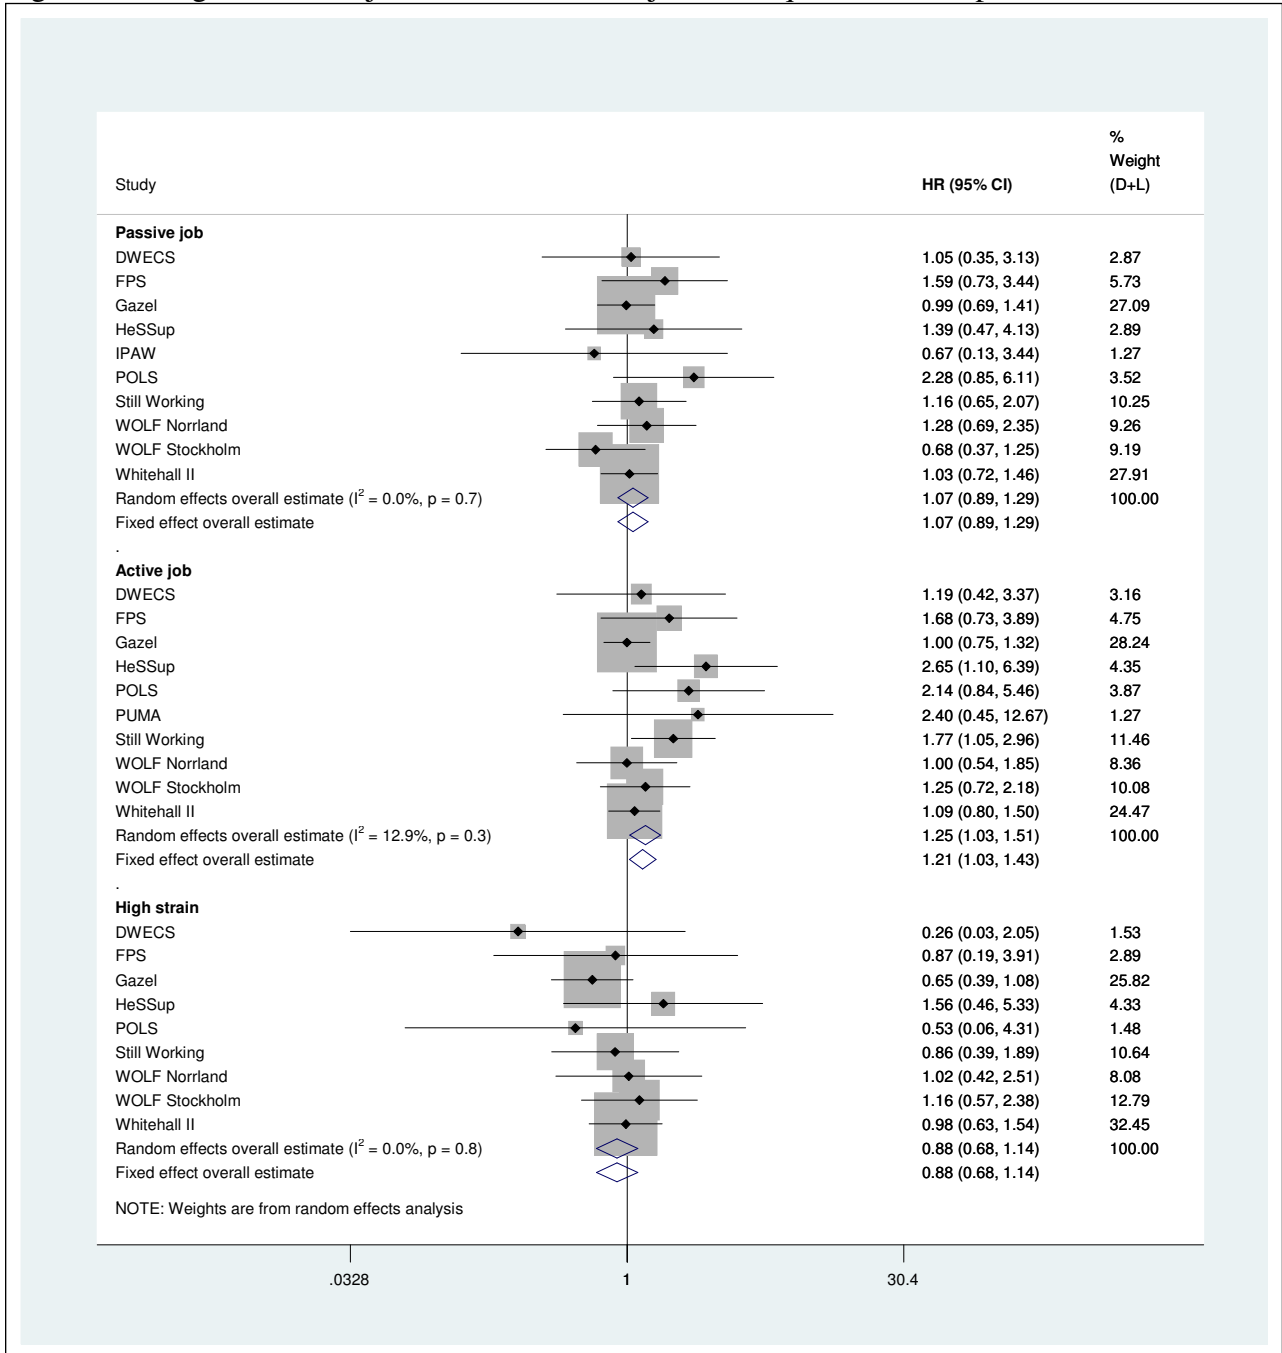

HR: hazard ratio, D+L: Der Simonian and Laird



Figure S9B. Multivariable-adjusted associations of job strain quadrants with prostate cancer risk

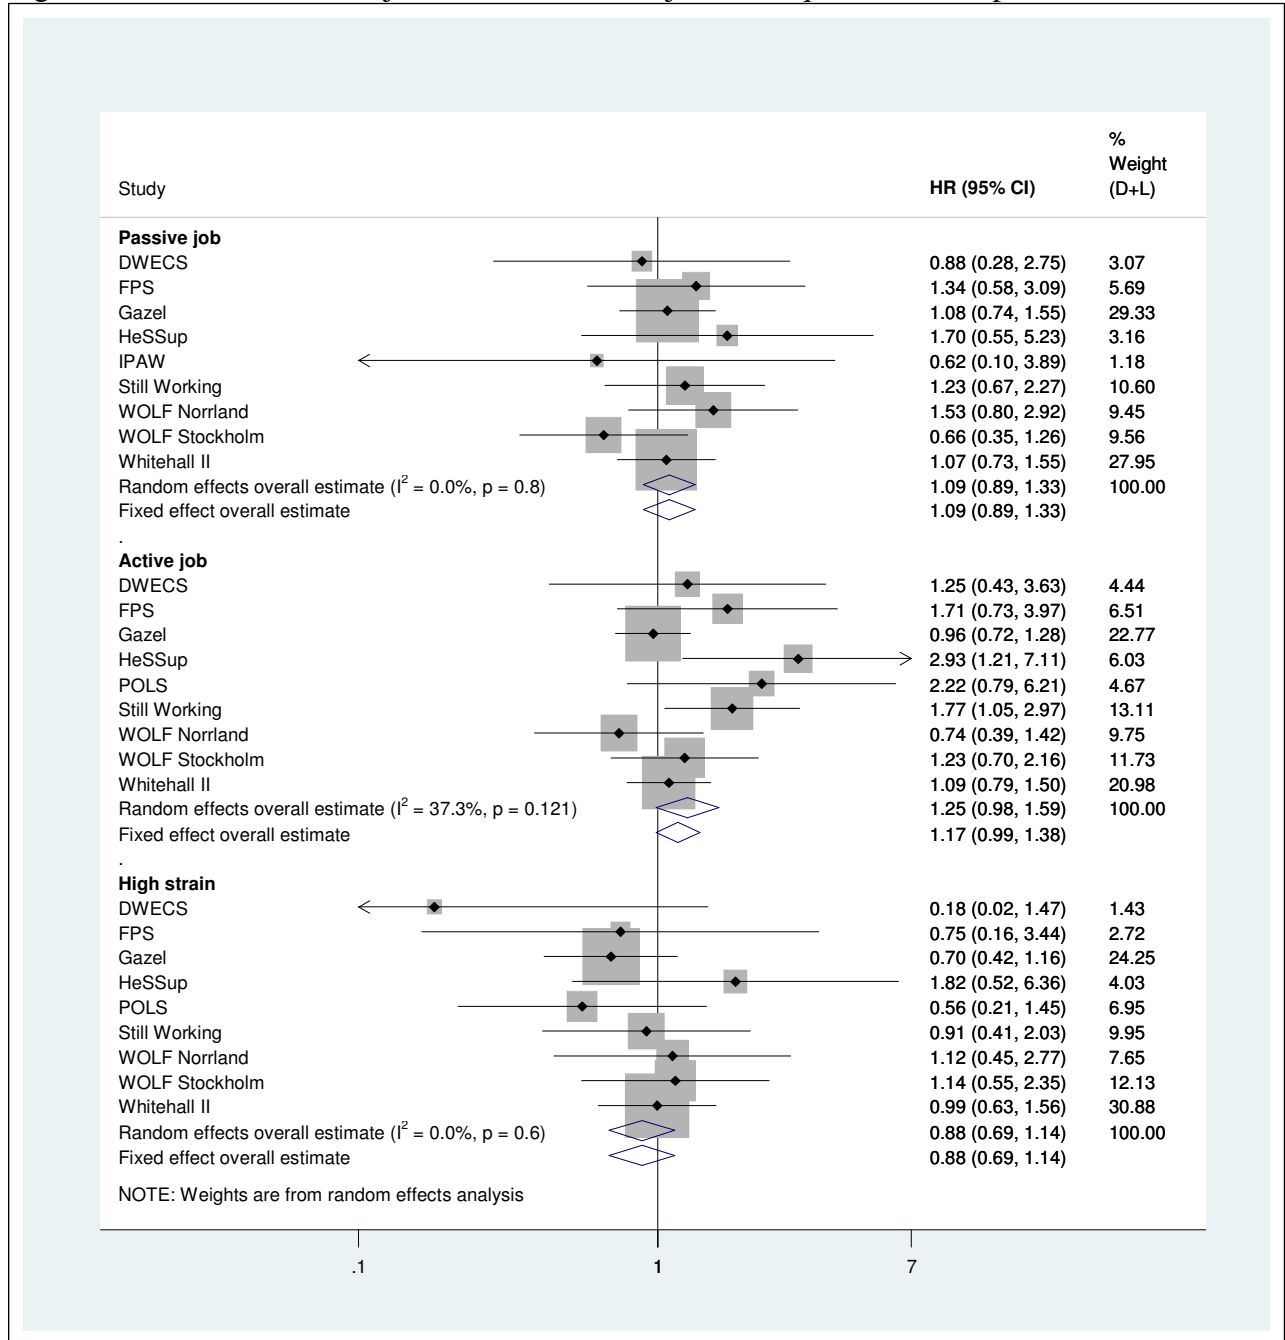

HR: hazard ratio, D+L: Der Simonian and Laird
